1 **Title:** Genomic asymmetry of the *Brassica napus* seed: Epigenetic contributions of DNA  
2 methylation and small RNAs to subgenome bias

3 **Running title:** Two's company: epigenome bias in the *Brassica napus* seed  
4

5 **Authors:** Dylan J. Ziegler<sup>1</sup>, Deirdre Khan<sup>1</sup>, Nadège Pulgar-Vidal<sup>2</sup>, Isobel A.P. Parkin<sup>3</sup>, Stephen  
6 J. Robinson<sup>3</sup>, Mark F. Belmonte<sup>1</sup>  
7

8 **Contact information:**

9 <sup>1</sup>Department of Biological Sciences, University of Manitoba, Winnipeg, Manitoba, R3T 2N2,  
10 Canada

11 <sup>2</sup>Department of Computer Science, University of Manitoba, Winnipeg, Manitoba, R3T 2N2,  
12 Canada

13 <sup>3</sup>Agriculture and Agri-Food Canada, Saskatoon, Saskatchewan, S7N 0X2, Canada

14 **Corresponding author: Mark Belmonte (Mark.Belmonte@umanitoba.ca)**  
15

16  
17 The author(s) responsible for distribution of materials integral to the findings presented in this  
18 article in accordance with the policy described in the Instructions for Authors  
19 (www.plantcell.org) is (are): Mark F. Belmonte (Mark.Belmonte@umanitoba.ca).  
20  
21  
22  
23  
24  
25  
26  
27  
28  
29  
30  
31  
32

33 **Abstract**

34

35           Polyploidy has predominated the genetic history of the angiosperms, and allopolyploidy  
36 is known to have contributed to the vast speciation of flowering plants. *Brassica napus*, one of  
37 the world's most important oilseeds, is one such polyploid species originating from the  
38 interspecific hybridization of *Brassica rapa* (A<sup>n</sup>) and *Brassica oleracea* (C<sup>n</sup>). Nascent  
39 amphidiploids must balance progenitor genomes during reproduction, though the role of  
40 epigenetic regulation in subgenome maintenance is unknown. The seed is the pivotal  
41 developmental transition into the new sporophytic generation and as such undergoes substantial  
42 epigenetic modifications. We investigated subgenome bias between the A<sup>n</sup> and C<sup>n</sup> subgenomes  
43 as well as across syntenic regions by profiling DNA methylation and siRNAs characteristic of *B.*  
44 *napus* seed development. DNA methylation and siRNA accumulation were prevalent in the C<sup>n</sup>  
45 subgenome and most pronounced early during seed morphogenesis. Hypermethylation during  
46 seed maturation was most pronounced on non-coding elements, including promoters, repetitive  
47 elements, and siRNAs. Methylation on siRNA clusters was more prevalent in syntenic regions of  
48 the C<sup>n</sup> subgenome and implies selective silencing of genomic loci of the seed. Together, we find  
49 compelling evidence for the asymmetrical epigenetic regulation of the A<sup>n</sup> and C<sup>n</sup> subgenomes of  
50 *Brassica napus* across seed development.

51

52

53

54

55

56

57

58

59

60

61

## 62 Introduction

63 Seed development of *Brassica napus* L. (canola) is a complex yet elegant chapter of the  
64 plant lifecycle that starts with the unfertilized ovule and ends with formation of the dry seed  
65 (Figure 1A). The first phase of seed development results from a double fertilization event that  
66 leads to the establishment of the embryo and the endosperm surrounded and protected by the  
67 maternally derived seed coat (Guignard, 1902; Dresselhaus and Franklin-Tong, 2013). Early in  
68 the morphogenesis phase, the globular (GLOB) embryo begins to differentiate through  
69 programmed cell divisions and establish tissue identities (Tykarska, 1976; Smith and Long,  
70 2010). By the HEART stage, the shoot and root apical meristems organize and will eventually  
71 give rise to the shoot and root systems of the next sporophytic generation of the plant (Tykarska,  
72 1979; also reviewed in the model *Arabidopsis* in Jenik et al., 2007). The onset of seed maturation  
73 begins with substantial cellular proliferation and growth of the embryo to fill the central cavity of  
74 the seed, followed by an arrest of proliferation and the accumulation of storage reserves, leading  
75 to the mature green (MG) stage of seed development (Tykarska, 1980; Leviczky et al., 2019).  
76 Maturation concludes with the rapid desiccation of the seed in preparation for dormancy at the  
77 dry seed (DS) stage.

78 *B. napus* occupies a unique position in the angiosperm history of polyploidy. While the  
79 species shares the ancestral whole genome duplications (WGDs) with *Arabidopsis* that paved the  
80 landscape for the diversity of the dicot lineages, *Brassica* is also preceded by a whole genome  
81 triplication (WGT) event that defines the Brassiceae (Ren et al., 2018; Franzke et al., 2011). *B.*  
82 *napus* has two discrete diploid genomes from progenitor species *Brassica rapa* ( $A^rA^r$ ) and  
83 *Brassica oleracea* ( $C^oC^o$ ), forming the amphidiploid *B. napus* ( $A^nA^nC^nC^n$ ). As a result, *B. napus*  
84 has a 6x duplication of genetic material relative to *Arabidopsis* and was formed 7500-12500  
85 years ago (Chalhoub et al., 2014). This combination of complicated genomic history with recent  
86 speciation means the *B. napus* genome possesses both broad syntenic regions and reshuffling of  
87 its progenitor subgenomes (Figure 1B) (Chalhoub et al., 2014; Cai et al., 2014). Thus, *B. napus*  
88 represents a valuable plant system for studying genome structure of recent polyploids.  
89 Unfortunately, epigenetic phenomena are a poorly understood component of allopolyploid  
90 genomes. While transcriptomic data implying subgenome bias in *B. napus* is becoming prevalent  
91 in the literature (Wu et al., 2018; Chalhoub et al., 2014), less consideration has been given to  
92 other elements of the genome that affect gene expression like DNA methylation or small RNAs

93 (sRNAs). The long-term consequences of subgenome bias are extensive genome fractionation  
94 characterized by gene loss and eventual loss of repetitive elements (REs) (Wendel et al., 2018;  
95 Cheng et al., 2018, 2014), but the immediate effect allopolyploidization has on the epigenetic  
96 landscape, particularly in reproduction, is unknown.

97 DNA methylation in plants occurs in every cytosine context (CG, CHG, CHH, where H =  
98 A, T, or C), with each context exhibiting notably different degrees of methylation and pathways  
99 of establishment and maintenance (Cokus et al., 2008; Matzke and Mosher, 2014). Previous  
100 works have profiled the DNA methylation signatures during seed development in *Arabidopsis*,  
101 maize, *Ricinus communis*, *Oryza sativa*, and *Glycine*, and ovule development in *Gossypium*  
102 (Bouyer et al., 2017; Narsai et al., 2017; Xing et al., 2015; Song et al., 2015; Davis-Richardson  
103 et al., 2016; Lin et al., 2017). However, studies of DNA methylation in allopolyploid plants such  
104 as *Gossypium hirsutum*, *Glycine dolichocarpa*, *Triticum*, and *Erythranthe perigrinus*, has  
105 primarily focused on vegetative tissues (Song et al., 2015; Coate et al., 2014; Gardiner et al.,  
106 2015; Li et al., 2014, 2017; Chalhoub et al., 2014; Bird et al., 2019; Li et al., 2016; Edger et al.,  
107 2017), and thus our understanding of how DNA methylation dynamics compare between  
108 progenitor subgenomes in allopolyploids during reproduction and seed development is less well-  
109 studied. Furthermore, no current studies have endeavoured to study DNA methylation patterns of  
110 seed development in the nascent allotetraploid *B. napus*.

111 Small RNAs also play a role in the regulation of genetic material encoded by the plant  
112 genome. The most studied sRNAs, micro RNA (miRNA), are involved in the regulation of gene  
113 expression via post-transcriptional silencing. miRNAs arise from a single stranded precursor  
114 which forms a secondary hairpin structure after transcription (Wang et al., 2019). Unlike  
115 miRNAs, small interfering RNAs (siRNA) do not solely operate in post-transcriptional silencing  
116 and can induce changes within the genome itself. siRNAs differ from miRNA in their mode of  
117 biogenesis, wherein siRNAs are transcribed by RNA Pol IV/V, and a complementary strand is  
118 synthesized by RNA-dependent RNA polymerase (RDR) to form a double-stranded siRNA  
119 precursor (Zhou and Law, 2015). siRNAs can be encoded by both intergenic and intronic  
120 regions, but can also originate from REs including transposable elements (TEs) and  
121 heterochromatic regions (Chen et al., 2018). siRNAs are capable of transcriptional silencing like  
122 miRNAs via natural anti-sense siRNA (NAT-siRNA) but can exert more versatile functions in  
123 genomic regulation. Repeat associated siRNA (rasiRNA), referred to in some literature as

124 heterochromatic siRNA, are typically encoded by REs and are most frequently associated with  
125 the silencing of TEs via RNA-directed DNA methylation (Wang and Axtell, 2017). Phased  
126 siRNA (phasiRNA) are encoded by a phased locus with repeating segments that are cleaved into  
127 multiple 21- or 24-nt mature phasiRNAs principally by DCL4 in dicots (Deng et al., 2018).  
128 siRNAs contributing to plant development are surfacing in the literature, but few consider  
129 siRNAs in the context of allopolyploid genomic bias. Our knowledge on how siRNAs  
130 accumulate in subgenomes of amphidiploids and the presence of subgenome bias is currently  
131 limited to vegetative tissues, with minimal information on these dynamics in reproduction (Shen  
132 et al., 2015). It is also unknown if certain classes of siRNAs accumulate asymmetrically or if  
133 these siRNAs are ancestrally conserved within subgenomes. To date, research on siRNA  
134 populations of *B. napus* are scarce and fewer profile siRNAs occurring across seed development.

135         The orchestration of seed development relies on a number of genomic factors. It is known  
136 that DNA methylation and RNA interference are critical processes underpinning development,  
137 and most studies examining patterns of methylation and non-coding RNA accumulation in the  
138 seed are in the model *Arabidopsis* (D'Ario et al., 2017; Bouyer et al., 2017; Kirkbride et al.,  
139 2019; Narsai et al., 2017). To date, little is known about epigenetics and their dynamics between  
140 subgenomes during seed development in amphidiploids like *B. napus*. To address these  
141 questions, we profiled both the DNA methylation and siRNA landscape across seed development  
142 and at critical developmental transitions of the seed lifecycle. Mapping of syntenic regions across  
143 the two progenitor subgenomes established horizontal comparisons between the A<sup>n</sup> and C<sup>n</sup>  
144 subgenomes (Figure 1C). Taken together, we find strong evidence for C<sup>n</sup> subgenome bias in the  
145 context of both DNA methylation and siRNA diversity, and find that the A<sup>n</sup> subgenome exerts  
146 epigenetic dominance over the submissive C<sup>n</sup> subgenome in seed development.

147

148

149

## 150 **Results**

### 151 **A and C subgenomes share vast syntenic regions**

152 Broad syntenic blocks are observed in both A<sup>n</sup> and C<sup>n</sup> subgenomes of *B. napus* (Figure  
153 1B). Here, we define syntenic regions as genomic blocks of colinear genes shared between the A  
154 and C subgenomes and recognize that the chromosomes of the A<sup>n</sup> and C<sup>n</sup> subgenomes are not  
155 entirely homologous in structure *sensu stricto*. As a result, we consider any blocks of colinear  
156 genes to be syntenic regions regardless of where the matching syntenic region is within the other  
157 subgenome. We report 778 syntenic regions spanning the A<sup>n</sup> and C<sup>n</sup> subgenomes collectively  
158 (>10kb) and account for 99.624% of the genome assembly (Dataset S1). Chromosomes are not  
159 horizontally comparable between the A<sup>n</sup> and C<sup>n</sup> subgenomes. While some chromosome pairs  
160 exhibit robust homology (ie. A01 and C01), others are more fractionated, with homologous  
161 regions largely spread throughout the other subgenome (ie. A06 and C06; Dataset S1). We used  
162 this information to frame the analysis of the A<sup>n</sup> and C<sup>n</sup> subgenomes in the context of DNA  
163 methylation and siRNA diversity defining *B. napus* seed development.

### 164 **The epigenetic landscape of seed development**

165 Despite the high degree of synteny between the A<sup>n</sup> and C<sup>n</sup> subgenomes, there is a notable  
166 difference in structure between the two subgenomes of *B. napus* cv. DH12075. The smaller A<sup>n</sup>  
167 subgenome had a higher density of gene models than the C<sup>n</sup> subgenome (Figure 2A). The larger  
168 C<sup>n</sup> subgenome had accumulated a greater density of repetitive elements (REs) that were also  
169 larger in size than in the A<sup>n</sup> subgenome (A<sup>n</sup>: 192,038 REs, C<sup>n</sup>: 293,260 REs; Figure 2A; Figure  
170 S1; F-Test, p<0.001; A<sup>n</sup> RE average = 396bp, C<sup>n</sup> RE average=608bp). In both subgenomes,  
171 mCG and mCHG was focused on areas of high RE density (Figure 2B). This corresponded with  
172 larger swathes of highly methylated cytosines in the RE-rich C<sup>n</sup> subgenome (Figure 2B, Table 1,  
173 Dataset S2). By contrast, active siRNA loci were distributed in areas of low RE density and high  
174 gene density (Figure 2C). An increase in CHH methylation was observed at the MG stage of  
175 seed development (Table 1, Dataset S2). Correspondingly, there was a genome-wide burst in  
176 siRNA detection at the MG stage of development (Figure 2C).

### 177 **Single base pair resolution profiling of the *B. napus* seed methylome reveals C<sup>n</sup> subgenome 178 bias**

179 Genome-wide cytosine methylation was calculated over 1kB windows for both GLOB  
180 and MG seed stages in all cytosine contexts and was compared to available methylation data for

181 leaves (Table 1, Dataset S2). We estimated bisulfite conversion efficiency using the  
182 unmethylated plastid genome as a reference (Ji et al., 2014), and estimated the bisulfite  
183 conversion rate to be ~98% in both the GLOB and MG samples (Figure 3A). We compared  
184 GLOB and MG seed methylome data to leaf methylome data, as a developmental comparison to  
185 a differentiated, vegetative tissue. Relative to leaves, seed development was characterized by a  
186 significant loss of mCG and mCHG levels (Table 1,  $p < 0.001$  Mann-Whitney-Wilcoxon).  
187 However, mCHH levels were nearly 3-fold higher at the MG stage than observed in globular  
188 seeds or in leaves (Figure 3A, Table 1,  $p < 0.001$  Mann-Whitney-Wilcoxon). This increase in  
189 mCHH contributed to a 2.5% increase in overall cytosine methylation of MG compared to  
190 GLOB seeds (Figure 3A).

191 We further identified differences in DNA methylation between leaves, GLOB, and MG  
192 seeds in addition to significant differences in the methylation of the A<sup>n</sup> and C<sup>n</sup> subgenomes of *B.*  
193 *napus*. In leaves, GLOB and MG seeds, mCG and mCHG levels were 1.4-1.5x higher in the C<sup>n</sup>  
194 than in the A<sup>n</sup> subgenome (Table 1, Mann-Whitney-Wilcoxon,  $p < 0.001$ ). Significant subgenome  
195 bias was also observed in CHH methylation, though mCHH levels were 1.1-1.2x higher in the C<sup>n</sup>  
196 subgenome than in the A subgenome. A sharp increase in mCHH during seed maturation nearly  
197 abolishes mCHH subgenome bias in MG seeds (Table 1, Mann-Whitney-Wilcoxon,  $p < 0.001$ ).  
198 Overall, while subgenome methylation bias persisted in *B. napus* leaves and seeds, this  
199 phenomenon was strongest in leaves and weakens in the seed as it matures (Table 1). We also  
200 compared cytosine methylation between the largest syntenic blocks between the A<sup>n</sup> and C<sup>n</sup>  
201 subgenomes (Figure 3B, Dataset S3), and found that a bias towards higher methylation of the C<sup>n</sup>  
202 subgenome was maintained over these high homology regions. However, there was variation in  
203 the extent of subgenome bias between the A<sup>n</sup> and C<sup>n</sup> syntenic blocks. CG and CHG methylation  
204 were only 1.2x higher on the C<sup>n</sup> counterpart in the A04/C04 syntenic pair, but was as high as 3.2x  
205 (CG) - 3.3x (CHG) higher on the C<sup>n</sup> counterpart on the A08/C05 pair in GLOB and MG seeds.  
206 There is a positive trend between degree of C<sup>n</sup>/A<sup>n</sup> subgenome bias with an increased relative  
207 C<sup>n</sup>/A<sup>n</sup> syntenic block size ( $R^2 = 0.70-0.78$  depending on cytosine context; Dataset S1). This may  
208 be a result of increased RE density in the C<sup>n</sup> subgenome (Figure 2A) as REs exhibit high  
209 methylation in all contexts (Figure 5A, Table 2).

210



211 **Unique suites of promoters are differentially methylated targeting genes involved in**  
212 **development and carbon metabolism**

213 Methylation on promoters is relatively stable during seed development. CG methylation  
214 on promoters does not significantly change between GLOB and MG seed stages (leaf mCG =  
215 71.8, GLOB mCG = 64.0, MG mCG = 63.8; Figure 4A; Table 2;  $p < 0.001$  Mann-Whitney-  
216 Wilcoxon). When GLOB and MG seeds were compared to leaves, 84.6% of CG differentially  
217 methylated promoters, and 77.8% of CHG differential methylation on promoters, was shared  
218 between the GLOB and MG seeds (Figure 4B, Figure S2), suggesting stability in promoter CG  
219 methylation patterns once seed development has initiated. Combined, these data suggest the  
220 developing seed is distinguished from vegetative leaves by lower levels of CG and CHG  
221 methylation on promoters that is maintained through the development and maturation of the  
222 seed. Subgenome bias in DNA methylation was also maintained through this shift. While CG  
223 methylation was significantly higher on GLOB and MG C<sup>n</sup> subgenome promoter elements  
224 (Figure 4A; Table 2), we did not identify significant differences between the A04/C04 and  
225 A07/C07 high homology regions (Dataset S3). Additionally, there was no significant difference  
226 in CHG methylation on the A04/C04, A05/C05, and A07/C07 syntenic regions despite an overall  
227 bias towards higher CHG methylation of the C<sup>n</sup> subgenome promoters (Figure 4A; Table 2,  
228 Dataset S3).

229 There is a significant increase in CHH methylation on promoter elements during seed  
230 development which favours higher mCHH on C<sup>n</sup> subgenome promoters (Figure 4A) in the  
231 A03/C03, A07/C06, and A02/C09 syntenic regions (Table 2; GLOB mCHH = 0.5%, MG mCHH  
232 = 6.4;  $p < 0.001$  Mann-Whitney-Wilcoxon; Dataset S3). We compared promoter element  
233 methylation of seeds to leaves and found that of the 1976 promoters differentially methylated  
234 between GLOB (933) and MG (1043) seeds and leaves (Figure 4B; Figure S2), 95% were  
235 derived from the C<sup>n</sup> subgenome (Dataset S4). To identify the biological processes affected by  
236 developmental shifts in promoter methylation, we examined enrichment of Gene Ontology (GO)  
237 terms for genes downstream of promoters differentially methylated between GLOB and MG  
238 seeds (Figure 4C, Dataset S4; significance of GO enrichment considered at  $p < 0.001$ ). At seed  
239 maturation, predicted biological processes involved in gene activation were heavily enriched in  
240 genes downstream of hypermethylated promoters, such as DNA binding (CG, CHG, CHH  
241 hypermethylated) and DNA-templated transcription (CHG and CHH hypermethylated). CHH



242 hypermethylation of promoters in MG seeds was also enriched for response to hormones such as  
243 ethylene, jasmonic acid, gibberellin, and auxin. We also observed CHH hypermethylation of  
244 promoters upstream of genes involved in cell division and differentiation, cell wall loosening,  
245 programmed cell death, and seed germination in GLOB seeds. Promoter hypomethylation of MG  
246 seeds were enriched for fatty acid biosynthesis (CHG hypermethylation) and carbon utilization  
247 (CHH hypermethylation), while promoters of genes involved in carbohydrate biosynthesis were  
248 targeted for hypermethylation (CHH). Therefore maturation-phase promoter hypermethylation  
249 appears to target hormone response, gene activation, and the balance between morphogenesis  
250 and quiescence, while promoter hypomethylation in seed maturation is likely associated with the  
251 release of genes for mobilizing carbon into lipid biosynthesis (Figure 4C).

252

### 253 **Transcription factors are hypomethylated relative to other protein-coding genes**

254 We examined the methylation levels of transcription factor (TF) genes relative to other  
255 protein coding genes and found significantly lower methylation on gene bodies and promoters of  
256 TF-coding genes (Figure S3; Table 2;  $p < 0.001$  Mann-Whitney-Wilcoxon). In leaves, GLOB, and  
257 MG seeds, transcription factor gene body methylation levels were reduced by 57-78% relative to  
258 the levels of other coding gene bodies (Figure S3; Table 2,  $p < 0.001$  Mann-Whitney-Wilcoxon).  
259 Transcription factor promoter CG and CHG methylation is significantly reduced relative to other  
260 coding genes, though reduction is less than observed on gene bodies. While mCG on seed TFs  
261 was significantly lower than observed in leaves, mCG levels did not significantly change  
262 between GLOB and MG seeds nor did they change on the promoters of TFs (Table 2;  $p < 0.001$   
263 Mann-Whitney-Wilcoxon). Additionally, subgenome methylation bias was maintained on TF  
264 gene bodies and promoter regions (Table 2).

265

### 266 **Methylation bias on repetitive elements during seed development**

267 In all three cytosine contexts, the vast majority of differential methylation between leaf  
268 and seed methylomes occurred on repetitive elements (Figure S4, Dataset S4). Methylation of  
269 CG and CHG contexts on REs was significantly reduced in seed development relative to leaves  
270 (leaf mCG = 91.5%; Table 2). CG methylation on REs was observed to be lower during seed  
271 morphogenesis and increased during seed maturation (GLOB mCG = 80.4%, MG mCG =  
272 84.6%; Table 2; significant  $p < 0.001$  Mann-Whitney-Wilcoxon). Overall, a degree of subgenome

273 bias was maintained during these shifts in CG methylation: mCG levels are 1.1x higher on C<sup>n</sup>  
274 subgenome REs (Table 2;  $p < 0.001$  Mann-Whitney-Wilcoxon); higher methylation of the C<sup>n</sup>  
275 subgenome REs is also observed between the largest syntenic blocks between the A<sup>n</sup> and C<sup>n</sup>  
276 subgenomes (Figure 5A). Further comparison of the REs within the largest syntenic regions  
277 between A<sup>n</sup> and C<sup>n</sup> subgenomes shows significant difference at the MG stage of seed  
278 development on A03/C03, A07/C06, and A02/C09 high homology regions (Dataset S3).  
279 Therefore, bias towards higher methylation of C<sup>n</sup> subgenome REs is most prevalent during seed  
280 maturation and is not evenly distributed throughout the genome.

281 CHG methylation on REs does not change significantly between the GLOB and MG  
282 stages of seed development (GLOB mCHG = 30.8%, MG mCHG = 32.4%, Table 2;  $p < 0.001$   
283 Mann-Whitney-Wilcoxon; Figure 5A). However, there is significantly higher CHH methylation  
284 on a unique suite of REs in maturation that is observed neither in leaves nor during seed  
285 morphogenesis (Figure S2). Lower of CG and CHG methylation relative to leaves is countered  
286 by an increase in CHH methylation on REs during seed maturation (leaf mCHH = 9.6%, GLOB  
287 mCHH = 7.2%, MG mCHH = 23.0%; Table 2; all significant  $p < 0.001$  Mann-Whitney-  
288 Wilcoxon) and is observed globally as well as within the largest syntenic regions of the genome  
289 (Figure 5A). Over 40% of CHH-DM REs were hypermethylated in the MG stage relative to  
290 leaves (Figure S2). CHH methylation of A<sup>n</sup> subgenome REs was 1.2x higher than C<sup>n</sup> subgenome  
291 REs in leaves, though this bias was abolished in the seed (Table 2,  $p < 0.001$ , Mann-Whitney-  
292 Wilcoxon), especially during the MG stage wherein comparison of the largest syntenic regions  
293 reveals no mCHH subgenome bias on REs (Figure 5A). This suggests extensive reprogramming  
294 of genome architecture around REs during seed development, driven by both a loss of CG and  
295 CHG methylation, and subgenome-independent increase of CHH methylation on REs during  
296 seed maturation.

297

### 298 **Methylation of SRCs during seed maturation**

299 Cytosine methylation increased 1.5-3.5 fold on siRNA clusters (SRCs) from the GLOB to  
300 the MG stage of seed development (GLOB mCG = 54.4%, MG mCG = 84.6%; GLOB mCHG =  
301 33.0%, MG mCHG = 52.22%; GLOB mCHH = 12.5%, MG mCHH = 44.08%; Table 2;  
302  $p < 0.001$  Mann-Whitney-Wilcoxon). Most notably, the mCHH levels of SRCs at the MG stage

303 are 4.9x higher than the whole genome average (Table 2), and nearly double the levels observed  
304 on REs (Figure 5A-B).

305 In general, we did not observe significant methylation bias on siRNAs between the A<sup>n</sup>  
306 and C<sup>n</sup> subgenomes (Table 2). However, in the largest syntenic blocks, a bias towards higher C<sup>n</sup>  
307 subgenome methylation in all cytosine contexts in GLOB and MG seeds was observed, with the  
308 exception of mCHH in GLOB seeds (Figure 5B). There was also a bias towards higher CG  
309 methylation of C<sup>n</sup> subgenomes in the A02/C02 (MG), A02/C09 (MG), A03/C03 (GLOB and  
310 MG), A04/C05 (MG), A07/C06 (GLOB and MG), A08/C05 (GLOB and MG) syntenic blocks  
311 (Dataset S3). In the CHH context, where the most dramatic shift in SRC methylation was  
312 observed, we identified bias on clusters in the A06/C02 and A08/C05 syntenic blocks (Dataset  
313 S3). Therefore, bias in the epigenome with regards to siRNAs is limited to comparisons within  
314 syntenic regions.

315

### 316 **siRNAs undergo shifts in diversity across seed development**

317 Next, we profiled small RNA populations, genome wide across *B. napus* seed  
318 development. The most striking differences occurred in the diversity of active SRCs across the  
319 five stages of seed development outlined in this work. For example, the MG stage of seed  
320 development contained the most active SRCs (61,929, Figure 6A). Of them, 41% and 59% were  
321 encoded by the A<sup>n</sup> and C<sup>n</sup> subgenome, respectively. This trend of bias towards the C<sup>n</sup> subgenome  
322 persists across all other seed stages, with 23,312 SRCs in the OV stage (39.7% and 60.3%),  
323 18,541 in the GLOB stage (41% and 59%), 10,276 in the HEART stage (42% and 58%), and  
324 4,800 in the DS stage (41.5% and 58.5%). The DS exhibits less than half of the total SRCs of the  
325 HEART stage, which was otherwise the least diverse stage. A complete list of all SRCs across  
326 seed development is found in Dataset S6.

327 Active rasiRNA and phasiRNA clusters underwent transitional changes in diversity  
328 throughout seed development. rasiRNAs increase in diversity particularly during the MG stage  
329 where a total of 35,840 active RNAs were identified (Figure 6B, Dataset S7). The GLOB stage  
330 seed exhibited the next-most diverse rasiRNA profile of 4,015 clusters, an order of magnitude  
331 less than that of the MG seed. C<sup>n</sup> subgenome bias was still prevalent in rasiRNA, with total  
332 rasiRNA clusters being 64%, 62.6%, 60.3%, 56.8%, and 63% encoded by the C<sup>n</sup> subgenome in  
333 the OV, GLOB, HEART, MG, and DS stages, respectively. rasiRNAs accumulated across seed

334 development, increased in diversity early in maturation, and sharply declined once the seed  
335 entered dormancy. rasiRNAs were an abundant siRNA type in our analysis - constituting 15.8%,  
336 21.7%, 26.0%, 57.8%, and 26.4% of the total SRCs in the OV, GLOB, HEART, MG, and DS  
337 stages, respectively.

338 phasiRNA clusters were most diverse early in seed development, with 143, 184, 129, 15,  
339 and 1 active cluster(s) in OV, GLOB, HEART, MG, and DS stages, respectively (Figure 6C,  
340 Dataset S7). phasiRNAs, however, instead show bias encoding loci towards the A<sup>n</sup> subgenome in  
341 early stages of development, wherein 55.6%, 51.7%, 46.3%, 42.9%, and 0% of the phasiRNA  
342 clusters are located within the A<sup>n</sup> subgenome in OV, GLOB, HEART, MG, and DS, respectively  
343 with the DS only having one detected phasiRNA. Interestingly, all mature phasiRNAs were  
344 predicted to be 24-nt long aside from the sole cluster in the DS stage, which was 21-nt. Thus,  
345 phasiRNAs are the only instance in which SRCs exhibit bias in the A<sup>n</sup> subgenome, and only in  
346 the early stages of reproductive development.

347

#### 348 **Promoter regions are implicated in siRNA regulatory mechanisms during seed maturation**

349 We furthered our study of promoter regions and gene bodies by identifying SRCs within  
350 them. We find that SRCs spike in diversity during the MG stage in both gene body and promoter  
351 contexts (Figure 7A, B). C<sup>n</sup> subgenome bias was universal across all seed stages and in both gene  
352 bodies and promoters. Subgenome bias also exhibited minimal fluctuations throughout  
353 development, with the C<sup>n</sup> subgenome encoding 57.1%, 54.7%, 54.3%, 54.8%, and 54.9% of the  
354 SRCs in gene bodies and 58.8%, 57.0%, 55.8%, 55.8%, and 58.0% within promoters in the OV,  
355 GLOB, HEART, MG, and DS stages, respectively. The MG stage is characterized by high  
356 diversity of SRCs in promoters, especially relative to that in gene bodies. 3295 and 4000 unique  
357 SRCs originated from gene bodies in the MG stage, while promoter regions accounted for 6232  
358 and 7872 SRCs in the A<sup>n</sup> and C<sup>n</sup> subgenomes, respectively. The disparity between siRNAs  
359 encoded in gene bodies and promoters during the MG stage was not noted in any other  
360 developmental stage to that level, with all other stages having less SRCs originating from  
361 promoter regions than gene bodies. Thus, the dramatic influx of siRNAs from promoter regions  
362 during the MG stage provides epigenetic evidence into this pivotal developmental transition of  
363 the seed lifecycle.

364

### 365 **siRNAs are implicated in developmental processes of the seed**

366 Due to the high siRNA diversity in the promoter context at the initiation of seed  
367 maturation, we performed GO enrichment analysis on the genes downstream of the associated  
368 SRCs encoded by promoter regions (Figure 7C, Dataset S8). We find that GO terms relating to  
369 zygote and endosperm development, protein localization, fertilization, and vesicle  
370 formation/transport to be significantly enriched early in seed development (gametogenesis and  
371 morphogenesis) ( $p < 0.001$ ). Though genes associated with mitochondrial activity were  
372 significantly enriched at every stage, we find genes associated with chloroplast activity were  
373 particularly ( $p < 0.00001$ ) enriched in the MG stage. Further, GO terms associated with the  
374 endomembrane system (endoplasmic reticulum, Golgi apparatus, plasmodesma) were  
375 significantly enriched at the MG stage. While both genes associated with fatty acid biosynthesis  
376 and lipid homeostasis were enriched in the MG stage, lipoyltransferase activity was instead  
377 enriched significantly in every stage except MG. The intervention of siRNAs in the regulation of  
378 genes related to cellular organization (endosperm development and protein localization) early in  
379 seed development in addition to the crucial biological processes implicated in seed maturation  
380 (lipid homeostasis, endomembrane activity) suggest that siRNAs may be playing a yet to be  
381 explored role in the maintenance of morphogenesis and maturation.

382

### 383 **Epigenome architecture of the *B. napus* seed is preserved in highly homologous** 384 **chromosomes**

385 The A01/C01 chromosome pair was over 99% colinear, implying high homology. The  
386 two major syntenic blocks on A01 and C01 were 15.7 Mb/26.5 Mb and 9.6 Mb/17.3 Mb in the  
387 A<sup>n</sup>/C<sup>n</sup> subgenomes, respectively (blocks 1 and 2, Figure 8). The DMRs were distributed similarly  
388 across all cytosine contexts, with CG and CHG methylation changing comparatively little  
389 between the GLOB and MG stages and CHH experiencing dramatic methylation shifts during  
390 seed maturation. siRNA density was highest in intergenic regions in both the GLOB and MG  
391 stages (Figure 8, Dataset S9). The two largest syntenic blocks (blocks 1 and 2, Figure 8) had  
392 similar siRNA densities. For example, siRNAs had the highest density on A01 further from the  
393 highly repetitive central region (presumed to be the centromere) and peaked at 65 and 213  
394 unique active SRCs per 100 kb in the GLOB and MG stages, respectively. This trend was also  
395 detected in the syntenic region of C01, wherein siRNA density peaked at 55/54 and 208/161 on

396 either side of the centromere in the GLOB and MG stages, respectively. The exception to this  
397 trend appears in a steep incline in SRCs in both the GLOB and MG stages on C01, wherein  
398 siRNA cluster density increases to 95 and 116 in the region neighboring the centromere. More  
399 highly repetitive regions also exhibit fewer changes in CG and CHG methylation contexts from  
400 morphogenesis to maturation. Together, this high homology chromosome pair shares similar  
401 genomic architecture across seed development and provides evidence into the conservation of  
402 epigenetic reprogramming amidst regions in this amphidiploid plant.

403

#### 404 **Low homology chromosomes conserve less epigenetic structure across seed development**

405 We used the A06/C06 chromosome pair as a model for low homology since these two  
406 chromosomes have smaller syntenic regions with larger non-syntenic gaps (Figure 9). The  
407 largest syntenic blocks were 2.6 Mb/6.2 Mb and 1.3 Mb/1.1 Mb in the A<sup>n</sup>/C<sup>n</sup> subgenomes,  
408 respectively, with many smaller colinear blocks found at 116 kb/190 kb and 219 kb/538 kb  
409 (Dataset S1). We compared the syntenic blocks of low homology chromosomes to gain insight  
410 into the epigenetic restructuring of polyploid plants across seed development.

411 In the largest syntenic block (block 1, Figure 9), two major peaks of active SRCs were  
412 identified in the C<sup>n</sup> subgenome (79 and 43 active clusters in the GLOB stage, 141 and 150 active  
413 clusters in the MG stage) relative to the single peak in SRCs observed in the A<sup>n</sup> subgenome in  
414 both the GLOB (53 clusters) and MG (176 clusters) seed stages. This is observed despite both  
415 regions maintaining high gene density regardless of the RE accumulation in the C<sup>n</sup> subgenome  
416 relative to the A<sup>n</sup> subgenome. The highly repetitive centromeric region of A06 and C06 exhibits  
417 a decline in siRNA density but is more pronounced in C06. Further, while siRNA density does  
418 increase with distal proximity to the centromere, this is especially pronounced in C06, wherein  
419 siRNA density jumps to 78 and 212 in the GLOB and MG stages, respectively (block 3, Figure  
420 9). This increase in diversity is not seen in the corresponding syntenic blocks of A06 – the  
421 smaller syntenic blocks (block 2 and 3, Figure 9) do not accumulate SRCs as seen in C06.  
422 Further, the same syntenic blocks undergo significant changes in CG methylation in the A<sup>n</sup>  
423 subgenome, but are absent in the C<sup>n</sup> subgenome, while both blocks 2 and 3 experienced greater  
424 CHG methylation changes between morphogenesis and maturation in C06 than seen in A06. On  
425 the global genomic scale, we find that greater length disparity of syntenic regions does not  
426 accumulate siRNA density linearly (Dataset S10, Figure S5). In all five seed stages, syntenic

427 blocks did not increase siRNAs to scale, even in blocks that were 2-9x larger in the C<sup>n</sup>  
428 subgenome than the A<sup>n</sup> subgenome. Interestingly, syntenic blocks of similar size had greater  
429 differences in SRC abundance than those with greater length disparity. This implies that the  
430 number of SRCs are conserved amongst syntenic regions and do not accumulate in longer  
431 intergenic regions. On the global genomic scale, we find that greater length disparity of syntenic  
432 regions does not accumulate siRNA density linearly (Dataset S10, Figure S5).  
433



## 434 **Discussion**

### 435 **The epigenetic bias of the C<sup>n</sup> subgenome of *Brassica napus***

436 The genome of *B. napus* comprises relatively intact subgenomes derived from the  
437 interspecific hybridization of *B. rapa* and *B. oleracea*. Genome bias often leads to disruption of  
438 genomic integrity, wherein allopolyploid plants can undergo chromosome fractionation as bias  
439 develops (Kellogg, 2003; Cheng et al., 2018). Genome fractionation in allopolyploids occurs at a  
440 stable rate, and often involves duplicate gene loss within the submissive genome (Emery et al.,  
441 2018). The epigenome provides an additional perspective on genome fractionation and bias  
442 where the selective silencing of one genome via siRNA activity and DNA methylation may  
443 reflect incipient genome dominance. Epigenome bias is prevalent across seed development in *B.*  
444 *napus* where consistent bias of cytosine methylation and siRNA clusters in the C<sup>n</sup> subgenome  
445 implies the selective silencing of its components, though to what extent remains uncertain. In  
446 synthesized allotetraploids interspecific hybridization can cause immediate silencing of genomic  
447 components, and lead to morphological dominance of one progenitor species over the other  
448 (Alexander-Webber et al., 2016; Comai et al., 2000; Wang et al., 2006).

449 Patterns of cytosine methylation and diversity of siRNA expression derived from TEs  
450 undergo substantial modifications upon allopolyploidization events. Among these, SRCs are  
451 become deregulated upon allopolyploidization and permit an increase in TE activity thereby  
452 generating instability within the genome (Kenan-Eichler et al., 2011). Cytosine methylation and  
453 siRNA diversity are biased towards the C<sup>n</sup> subgenome in the *B. napus* seed indicating repression  
454 of its relative contribution to seed development and by extension is submissive to the A<sup>n</sup>  
455 subgenome. These SRCs were also subject to dramatic CHH hypermethylation. This  
456 phenomenon of C<sup>n</sup> subgenome bias persists within the observed increase in siRNA diversity at  
457 the MG stage where rasiRNAs are also most abundant. The greater accumulation of non-coding  
458 elements such as siRNAs and REs in the C<sup>n</sup> subgenome may contribute to a greater overall  
459 increase in mCHH of the same C<sup>n</sup> subgenome as the seed develops. Extensive methylation of  
460 promoters in the C<sup>n</sup> subgenome and methylation on SRCs in broad syntenic blocks furthers this  
461 bias. Together, the C<sup>n</sup> subgenome appears to accumulate silencing elements that persist across all  
462 stages of the seed lifecycle, and experiences selective silencing in syntenic regions  
463 corresponding to the A<sup>n</sup> subgenome. As a result, syntenic regions do not mirror epigenetic

464 structure in the *B. napus* seed. Acute subgenome bias defines the epigenetic dynamics at play  
465 during seed development in this amphidiploid species.

466

### 467 **The contribution of repetitive elements to subgenome bias in *B. napus* seed development**

468 Maturation in seed development is characterized by the rapid deposition of protein and  
469 lipid energy stores for the developing seed and coincides with an enormous influx of both siRNA  
470 clusters and DNA methylation, especially in the CHH context. The influx of active siRNA  
471 clusters in the MG stage can be largely attributed to the profound increase in rasiRNA diversity.  
472 This accumulation of siRNAs derived from REs in the genome implies their importance in  
473 modulating DNA methylation, particularly in the CHH context, late in seed development. The  
474 lack of rasiRNA diversity in the DS stage is likely a product of developmental stasis achieved in  
475 seed dormancy.

476 Repetitive elements can be targets of epigenetic modification especially in allopolyploid  
477 plants, like *B. napus* (Parisod et al., 2010, 2009). An abundance of REs in one progenitor  
478 genome may lead to downstream epigenetic modification in a hybrid polyploid (Wendel et al.,  
479 2018). Here, we observe subgenome bias was most dramatic on REs in *B. napus* seeds and  
480 leaves. In the current study, REs are more highly methylated in the *B. oleracea* subgenome of *B.*  
481 *napus*. While this phenomenon has been observed in vegetative tissues (Chalhoub et al., 2014)  
482 and microspores (Li et al., 2016), our data suggests epigenetic modifications go beyond what is  
483 observed in vegetative leaves via CHH hypermethylation on REs. DNA methylation may  
484 provide an additional level of epigenetic regulation that serves to modulate variable or novel  
485 regions of the genome. Thus, trends in subgenome bias favouring higher methylation of the C<sup>n</sup>  
486 subgenome may be a consequence of its higher RE load.

487 In *B. napus*, our data provides evidence of a global loss of methylation on REs, especially  
488 from the A<sup>n</sup> subgenome, in the CG and CHG contexts relative to leaves. Thus, a higher level of  
489 methylation is still maintained on the REs in the C<sup>n</sup> subgenome. Currently, we cannot detect  
490 whether this loss of methylation on REs is via a passive or active process; it is possible that loss  
491 of mCG and mCHG in seeds is a passive process that occurs over the numerous cell divisions  
492 and DNA replication cycles that establish the seed. Whether a loss of methylation relative to  
493 leaves is actively or passively achieved, it appears that C<sup>n</sup> subgenome bias is a feature that  
494 persists over the transition of the plant to the next sporophytic generation.

495

## 496 **RdDM as a modulator of developmental transitions in seed development**

497 Active demethylation of REs in ephemeral reproductive structures such as vegetative  
498 nuclei in pollen and the endosperm may lead to the activation of small RNA machinery to  
499 modify DNA methylation in other cells (Gehring et al. 2009, Slotkin et al. 2009, Century et al.  
500 2012). It is known that DNA hypomethylation in *Arabidopsis* gametophytes cause alterations in  
501 seed size, and that interference in DNA methylation machinery causes loss of seed viability  
502 (Zhang et al., 2010; Xiao et al., 2006b, 2006a). Interestingly, the two stages exhibiting the  
503 highest siRNA diversity in our dataset were the OV and MG stage. The bimodal accumulation of  
504 siRNAs at gametogenesis and again at maturation fall in line with the developmental importance  
505 of these stages that lead to the initiation of the seed and the finalization of its development prior  
506 to dormancy. Given the predominant role siRNAs play in managing DNA methylation via the  
507 canonical RdDM pathway, the siRNA diversity early and late in seed development may indicate  
508 versatile processes vital to seed development depend on the action of siRNAs in *B. napus*.  
509 Patterns of siRNA accumulation and cytosine methylation shift around genes involved in cell  
510 division and growth in *B. napus* seed development. During early seed development, siRNAs  
511 accumulate in promoters of genes associated with zygote and endosperm development, whereas  
512 in late seed development, promoters of genes involved in cell division and  
513 auxin/giberellin/cytokinin are targeted for CHH hypermethylation. These targets reflect the  
514 developmental phenotypes observed in *Arabidopsis* lacking DNA methylation machinery,  
515 wherein improper cellular divisions are frequently observed (Kim et al., 2008; Xiao et al., 2006b,  
516 2006a).

517 RdDM in maternal tissues is essential for early *B. rapa* seed development (Grover et al.  
518 2018). Given that the maternal seed coat makes up a substantial portion of the *B. napus* seed at  
519 this stage, it is possible that some patterns of early RdDM activation is maintained from its  
520 progenitor *B. rapa*. The role of RdDM in seed maturation is still unclear, though it appears to be  
521 characteristic of seed maturation, but viably non-essential in the model system *Arabidopsis* (Lin  
522 et al., 2017; Bouyer et al., 2017). We found that siRNA loci were heavily methylated in mature  
523 *B. napus* seeds, where the embryo comprises the vast majority of the seed body. A  
524 spatiotemporal analysis of DNA methylation and small RNA accumulation in the embryo,  
525 endosperm, and seed coat would provide insight into the RdDM in the maternal and zygotic

526 tissues throughout seed development, and whether the embryo, endosperm, and seed coat are all  
527 subject to the same regimes of subgenome bias observed in whole seeds.

528

### 529 **Subgenome bias of rasiRNAs is progressively lost throughout seed development**

530 Early in seed development rasiRNAs constitute much less of the total siRNA profile  
531 when compared to maturation stages. Despite this, the C<sup>n</sup> subgenome bias of rasiRNA species  
532 are most accentuated early in seed development and is progressively lost as the seed matures.

533 This suggests the dominant action of the A<sup>n</sup> subgenome is most prevalent early in seed  
534 development, with the C<sup>n</sup> subgenome being asymmetrically silenced by the action of rasiRNAs  
535 during gametogenesis and morphogenesis.

536 Maturation in seed development is characterized by the rapid deposition of protein and  
537 lipid energy stores for the developing seed and coincides with an enormous influx of both siRNA  
538 clusters and DNA methylation, especially in the CHH context. The influx of active siRNA  
539 clusters in the MG stage can be largely attributed to the increase in rasiRNA diversity. This  
540 accumulation of siRNAs derived from REs in the genome implies their importance in  
541 modulating DNA methylation, particularly in the CHH context, late in seed development. The  
542 erasure of rasiRNA diversity in the DS stage is likely a product of developmental stasis achieved  
543 in dormancy. This peak in diversity is complemented by the lowest bias in the C<sup>n</sup> subgenome and  
544 extensive global CHH methylation. This is echoed by extensive CHH methylation observed  
545 during seed maturation in the diploid model plant *Arabidopsis* (Kawakatsu et al., 2017), and  
546 suggests that the global CHH methylation characteristic of maturation overrides subgenome bias  
547 in allopolyploids.

548

### 549 **phasiRNA diversity is abolished in seed maturation of *B. napus***

550 The presence of phasiRNAs in reproductive tissues is most extensively documented in  
551 the Poaceae but is now emerging to be important in dicot lineages (Xia et al., 2019). It is known  
552 that phasiRNAs are implicated in seed coat development and flowering time in the Malvaceae  
553 and Rutaceae, respectively, but reproductive 24-nt phasiRNAs are thought to be broadly absent  
554 in the Brassicaceae (Liu et al., 2017; Zhao et al., 2020) Despite this, the OV, GLOB, and  
555 HEART stages accumulate the vast majority of phasiRNAs in *B. napus* seed development and  
556 may be reflective of the reproductive roles phasiRNAs perform in the aforementioned taxa. Here,

557 we report that 24-nt phasiRNAs accumulate during early reproductive stages of seed  
558 development and become depauperate as the seed matures. The restricted window of phasiRNA  
559 activity in *B. napus* may account for the lack of documentation of the 24-nt phasiRNA pathway  
560 in the Brassicaceae. This was predicted by Xia et al., (2019), and suggests the pathway exists in  
561 the family, though it may have only been retained in lineages outside the Camelinae.

562

### 563 **Synteny as an important predictor of genome bias in allopolyploids**

564 It is known that even in extensively polyploid clades that syntenic blocks are preserved  
565 throughout generations of ploidy changes and genomic stress (Hardigan et al., 2020). However,  
566 while stability of syntenic regions may be preserved over extensive evolutionary time in  
567 polyploids, it is unknown whether the epigenome of syntenic regions in allopolyploid progenitor  
568 genomes experience the same retention. The epigenome is vitally important to the management  
569 of genome stability and provides a provisional solution to times of genomic shock (Ha et al.,  
570 2009; Springer et al., 2015). We find evidence for the lens of synteny to be valuable in  
571 demonstrating bias at the epigenome level, wherein syntenic regions across the genome  
572 experience asymmetric DNA methylation and accumulation of siRNAs not seen globally in the  
573 genome. As it stands, the variables determining which subgenome persists as dominant are still  
574 enigmatic, but the epigenetic biases documented here in the nascent amphidiploid *B. napus*  
575 suggest epigenomic bias begins and establishes early in the species' history. As a result,  
576 epigenome architecture of syntenic regions may be an important factor in determining the  
577 evolutionary trajectory of the species and is especially relevant to the ubiquitously polyploid  
578 crop plants.

### 579 **Materials and Methods**

580

581 The DH12075 genome sequence and annotation were provided by Drs. Isobel Parkin and Steve  
582 Robinson via the Canadian Canola Genome Sequencing industry consortium project.

583

### 584 **Plant growth conditions and sample collection**

585 Methylome analyses were performed in *B. napus* cv. DH12075. Plants were grown in  
586 growth chambers under long day conditions at 22°C. Flowers were hand-pollinated and collected  
587 at 0 DPF (OV), 7 DPF (GLOB), 10 DPF (HEART), 28 DPF (MG), and 35 DPF (DS). Seeds

588 were manually harvested from siliques and ground in liquid nitrogen for nucleic acid extractions.  
589 DNA was isolated from seeds using the Qiagen Plant DNeasy Mini Kit. RNA was isolated from  
590 seeds using the Qiagen miRNeasy mini kit. Three bioreplicates were used for WGBS and  
591 sRNAseq.

592

### 593 **Synteny map of the DH12075 genome**

594 Syntenic regions were determined using MCScan under default parameters (Tang et al.,  
595 2008). The DH12075 A<sup>n</sup> subgenome was compared to the C<sup>n</sup> subgenome to output the colinear  
596 regions linking the two.

597

### 598 **Methylome library preparation and sequencing**

599 Library preparation for bisulfite sequencing was performed at Genome Quebec. DNA  
600 was sheared via sonication on the Covaris platform prior adaptor ligation and bisulfite  
601 conversion using the EZ-96 DNA Methylation-Lightning Kit (Zymo®). Libraries were then  
602 amplified using the DNA UltraII Kit (NEB®). Libraries were sequenced on the HiSeq X  
603 platform (2 lanes, 150bp PE). Bisulfite-sequencing was performed on three replicates for both  
604 stages. A total of 1.24 billion 150bp paired-end reads were generated from the globular and  
605 mature green libraries. Chloroplast genome cytosine methylation was used as a proxy to estimate  
606 bisulfite non-conversion rate -conversion efficiency is estimated to be ~98%. Bisulfite-  
607 sequencing libraries (> 97% bisulfite conversion rate) (Dataset S5) for both samples.  
608 Approximately 67% of paired reads aligned to the *B. napus* cv. DH12075 genome (Dataset S5).  
609 Differential methylation was determined over 400bp windows using MethylKit (Akalin et al.  
610 2012). Promoter regions were calculated as 1000bp regions upstream of the TSS of a gene. To  
611 identify genes with upstream regulatory regions containing DMRs, overlap of the 400bp DMR  
612 regions and the 1000bp upstream promoter regions was calculated using BEDtools. Homologous  
613 genes in the Darmor Bzh annotation were identified, and enrichment of transcript accumulation  
614 patterns was performed using SeqEnrich (Becker et al. 2017).

615

### 616 **Bisulfite sequencing analysis**

617 Quality trimming and adaptor removal were performed using Trimmomatic  
618 (<http://www.bioinformatics.babraham.ac.uk/projects/fastqc/>). Successfully paired reads were

619 aligned to the DH12075 genome using BSMAP2, and cytosine methylation levels were called  
620 using the methratio script (Xi and Li 2009). Individual cytosines had to be covered by at least 4  
621 reads to be considered for analysis. Average DNA methylation over 1kB regions, and average  
622 methylation ratios of genes, REs, and promoters were calculated using BEDtools (Quinlan and  
623 Hall 2010). We also examined the effect of bin size on determining subgenome bias in average  
624 methylation and found that the C subgenome was detected as more highly methylated regardless  
625 of bin size (Dataset S5). Differential methylation was determined over 400bp windows using  
626 MethylKit (Akalin et al. 2012). Promoter regions were calculated as 1000bp regions upstream of  
627 the TSS of a gene.

628

### 629 **Small RNA library preparation and sequencing**

630 Total RNA collected from seeds was used for library prep with the NEBNext<sup>®</sup> Small  
631 RNA Library Prep Set for Illumina<sup>®</sup> (Multiplex compatible). Libraries were pooled and  
632 sequenced on the Illumina HiSeq2500 (2 lanes, 50bp SE). Quality trimming and adaptor removal  
633 were completed with Trimmomatic (Dataset S5). Surviving reads were aligned to the DH12075  
634 genome using Bowtie on default settings, with an average of 87% alignment (Dataset S5).  
635 Aligned reads were then filtered for rRNA, tRNA, snRNA, and snoRNA species by aligning  
636 them to known records in NCBI under all Viridiplantae.

### 637 **SRC identification and analysis**

638 siRNA prediction was done using Short Stack on default settings (Axtell, 2013). SRCs  
639 overlapping 90% with a predicted SRC in another bioreplicate were passed through analysis to  
640 coincide with miRNA criteria covered in Axtell and Meyers (2018). SRCs overlapping with REs  
641 were classified as rasiRNAs, and SRCs exceeding a phase score of 25 were classified as  
642 phasiRNAs. siRNA density was calculated in 100 kB windows. Homologous genes in the  
643 Darmor Bzh annotation were identified and GO enrichment on genes downstream of SRCs  
644 localized to the corresponding promoter was performed using SeqEnrich (Becker et al. 2017).

645

### 646 **GEO Accession**

647 Note: at the time of submitting this manuscript, our data was still uploading to NCBI. The GEO  
648 accession number should be available to the reviewers at this time.



649

## 650 **Supplemental Data Files**

651 Dataset S1. Syntenic block coordinates and short list of the longest contiguous syntenic block  
652 pair per chromosome. Average methylation within each of the largest syntenic blocks included  
653 both as a table and as a scatterplot visualization.

654 Dataset S2. Methylation levels over 1kB bins for leaves, globular stage seeds (GLOB), and  
655 mature green stage seeds (MG). Methylation levels of all genes, promoters, and transposable  
656 elements are also included. Mean methylation levels were calculated based on individual  
657 cytosine methylation levels in each 1kB bin using BEDtools. Each context was considered  
658 separately. Methylation levels calculated across different bin sizes are also shown.

659 Dataset S3. Cytosine methylation over the largest syntenic blocks. Average methylation is shown  
660 for CG, CHG, and CHH contexts for leaves, globular (GLOB), and mature green (MG) seeds  
661 over 1kb windows, genes, promoters, and repetitive elements (REs) that overlapped the largest  
662 syntenic regions between the An and Cn subgenomes. The results of the Mann-Whitney Wilcox  
663 test (Bonferroni correction) are included.

664 Dataset S4. Methylation levels over 1kB bins for leaves, globular stage seeds (GLOB), and  
665 mature green stage seeds (MG). Methylation levels of all genes, promoters, and transposable  
666 elements are also included. Mean methylation levels were calculated based on individual  
667 cytosine methylation levels in each 1kB bin using BEDtools. Each context was considered  
668 separately. Methylation levels calculated across different bin sizes are also shown.

669 Dataset S5. Alignment rates and QC of WGBS and sRNAseq data

670 Dataset S6. Complete identifier (Chromosome\_start\_stop) and sequence of all siRNA clusters  
671 (sequences are of complete cluster, and do not necessarily indicate the mature siRNA sequence)  
672 in each developmental stage: OV, GLOB, HEART, MG, DS.

673 Dataset S7. siRNA clusters identified as either rasiRNAs or phasiRNAs in each developmental  
674 stage: OV, GLOB, HEART, MG, DS. siRNAs intersecting with repetitive elements deemed  
675 rasiRNAs, and siRNAs exceeding a phase score of 25 per Short Stack's analysis were deemed  
676 phasiRNAs.

677 Dataset S8. Total number of SRCs intersecting with genes and promoters. Complete gene list of  
678 SRCs intersecting with promoters, and the GO enrichment of the same gene lists.

679 Dataset S9. siRNA cluster density in 1000kB windows in each developmental stage: OV, GLOB,  
680 HEART, MG, DS.

681 Dataset S10. Length and siRNA cluster quotient of the C and A subgenomes, respectively.  
682 Scatterplots are present to visualize the relationship between the degree of genomic bias in  
683 length and in siRNA abundance within syntenic pairs.

684

685 **Author Contributions**

686 D.K. and D.J.Z. designed and performed research, analyzed data, and co-wrote the article.  
687 N.P.V. developed data analysis tools, drafted figures, and analyzed data. I.A.P. and S.J.R.  
688 contributed the DH12075 genome build/annotation and provided feedback on the manuscript.  
689 M.F.B. designed research and co-wrote the article.

690

691 **Acknowledgements**

692 We would like to thank Dr. Olivia Wilkins for their feedback and helpful discussion of the  
693 manuscript. We would also like to thank Grigory Shamov and Ali Karrache (WestGrid/Compute  
694 Canada) for their technical support. Sequencing was performed at Genome Québec. This work  
695 was supported through generous funding from the Natural Science and Engineering Research  
696 Council of Canada to Mark Belmonte.

697

698

A

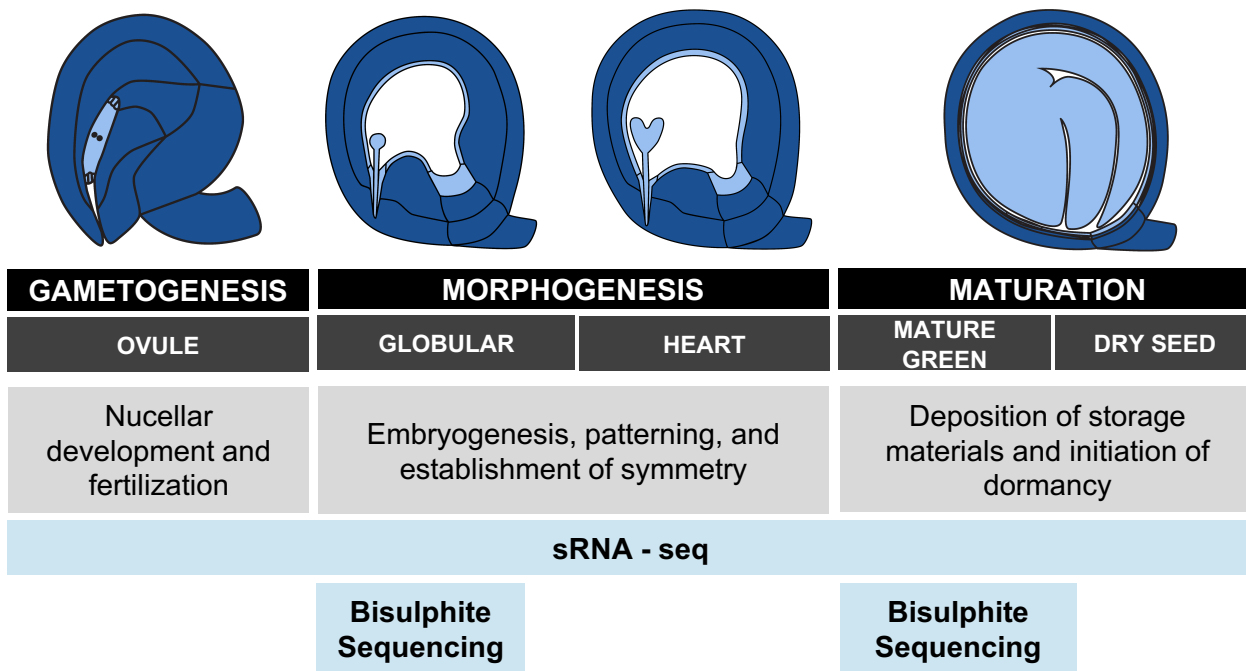

B

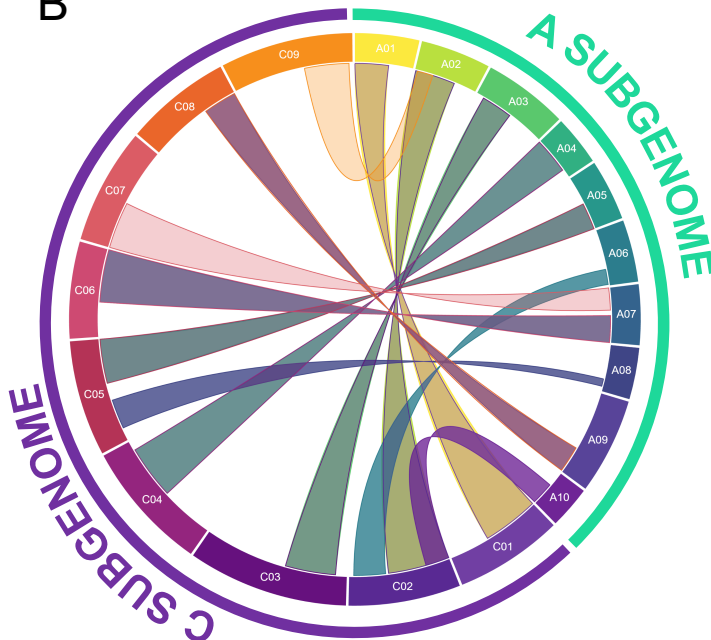

C

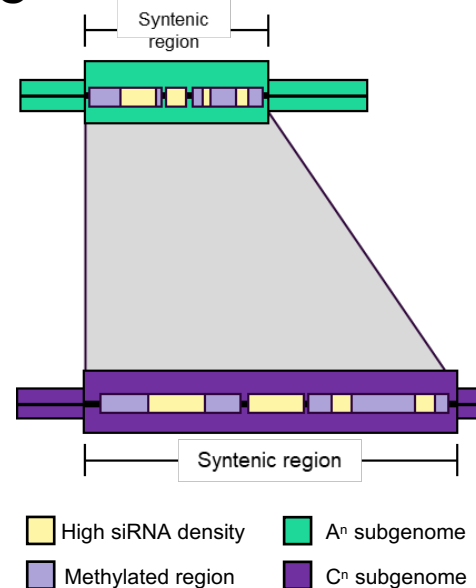

**Figure 1. Hypothetical model of epigenetics underpinning seed development in the *B. napus* seed.** (A) Seed development can be divided into five discrete stages from the beginning of gametogenesis to the end of maturation (ovule (OV), globular (GLOB), heart (HEART), mature green (MG), and dry seed (DS)). We completed sRNA-seq for all five of these stages and bisulphite sequencing for the GLOB and MG stages, representing pivotal developmental transitions in the initiation of morphogenesis and maturation respectively. (B) Circos diagram showing the largest continuous syntenic block of each chromosome within the *B. napus* genome. (C) Hypothetical model of epigenetic conservation – broad syntenic regions of the genome indicate high conservation between the two subgenomes. Conservation of these regions may lead to similar epigenetic architecture in reproduction.

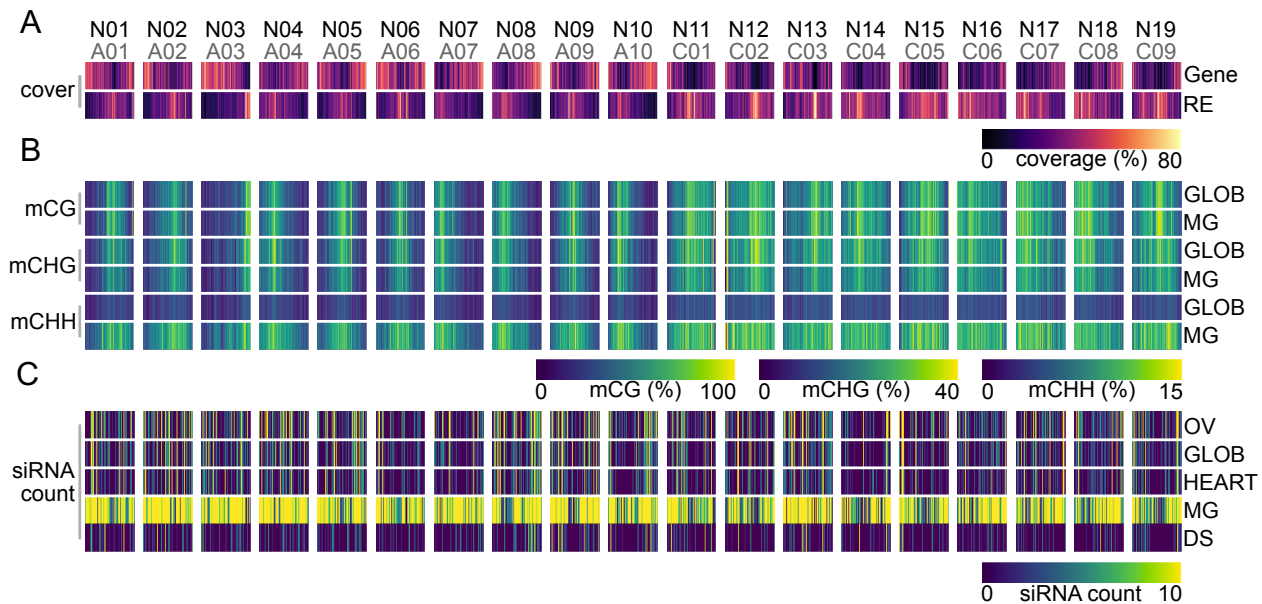

**Figure 2. The epigenetic landscape of the *Brassica napus* seed.** Both the N (black) and A/C (grey) chromosome notation are indicated for chromosomes (A) Coverage (%) of 100kB fixed windows by genes and repetitive elements (RE) across the DH12075 *B. napus* genome. High coverage (80%) is indicated by yellow fill, and low coverage (0%) is indicated by dark purple fill. (B) Average methylation in each cytosine context (CG, CHG, CHH) are shown separately for the GLOB and MG stages of seed development. High methylation levels (CG: 100%, CHG: 40%, CHH: 15%) are indicated by a yellow colour, and low methylation (0%) is indicated by a purple fill. (C) Total number of detected/active siRNA clusters in 100kB bins across the ovule (OV), globular (GLOB), heart (HEART), mature green (MG), and dry seed (DS) stages of development. A high count (10) is indicated by yellow fill, and low counts (0) are indicated by purple fill.

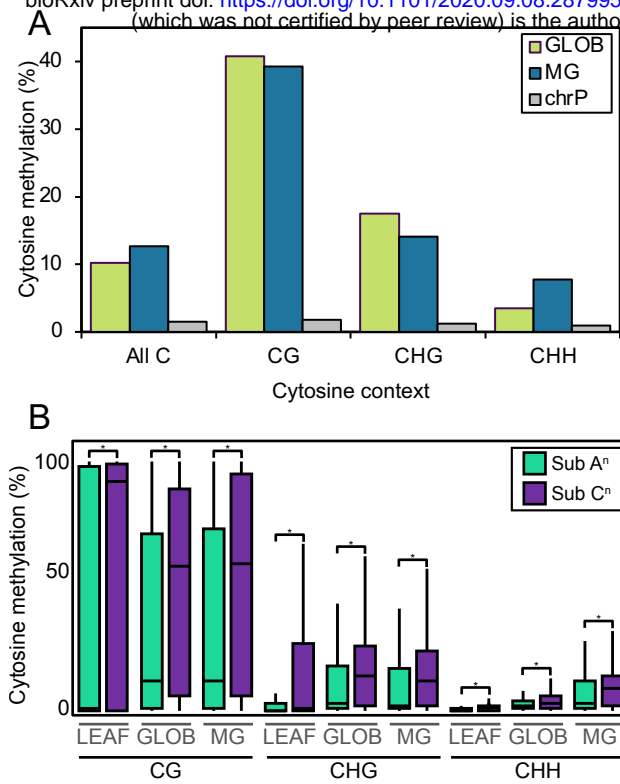

**Figure 3. The DNA methylation in *Brassica napus* seed development.** (A) Average methylation levels by cytosine context. Average methylation for all covered cytosines is shown for the GLOB (green), MG (blue), and plastidial (grey) genomes. (B) Level of methylation in the largest syntenic regions between the A<sup>n</sup> (teal) and C<sup>n</sup> (purple) subgenomes of *B. napus*. Quantile boxplots show level of cytosine methylation as calculated in 1kB windows in the syntenic regions for leaves, and GLOB and MG seeds in the CG, CHG, and CHH contexts. Significant differences in cytosine methylation between the two subgenomes is indicated with an asterisk ( $p < 0.001$  Mann-Whitney-Wilcoxon, Bonferroni adjustment for multiple comparisons).

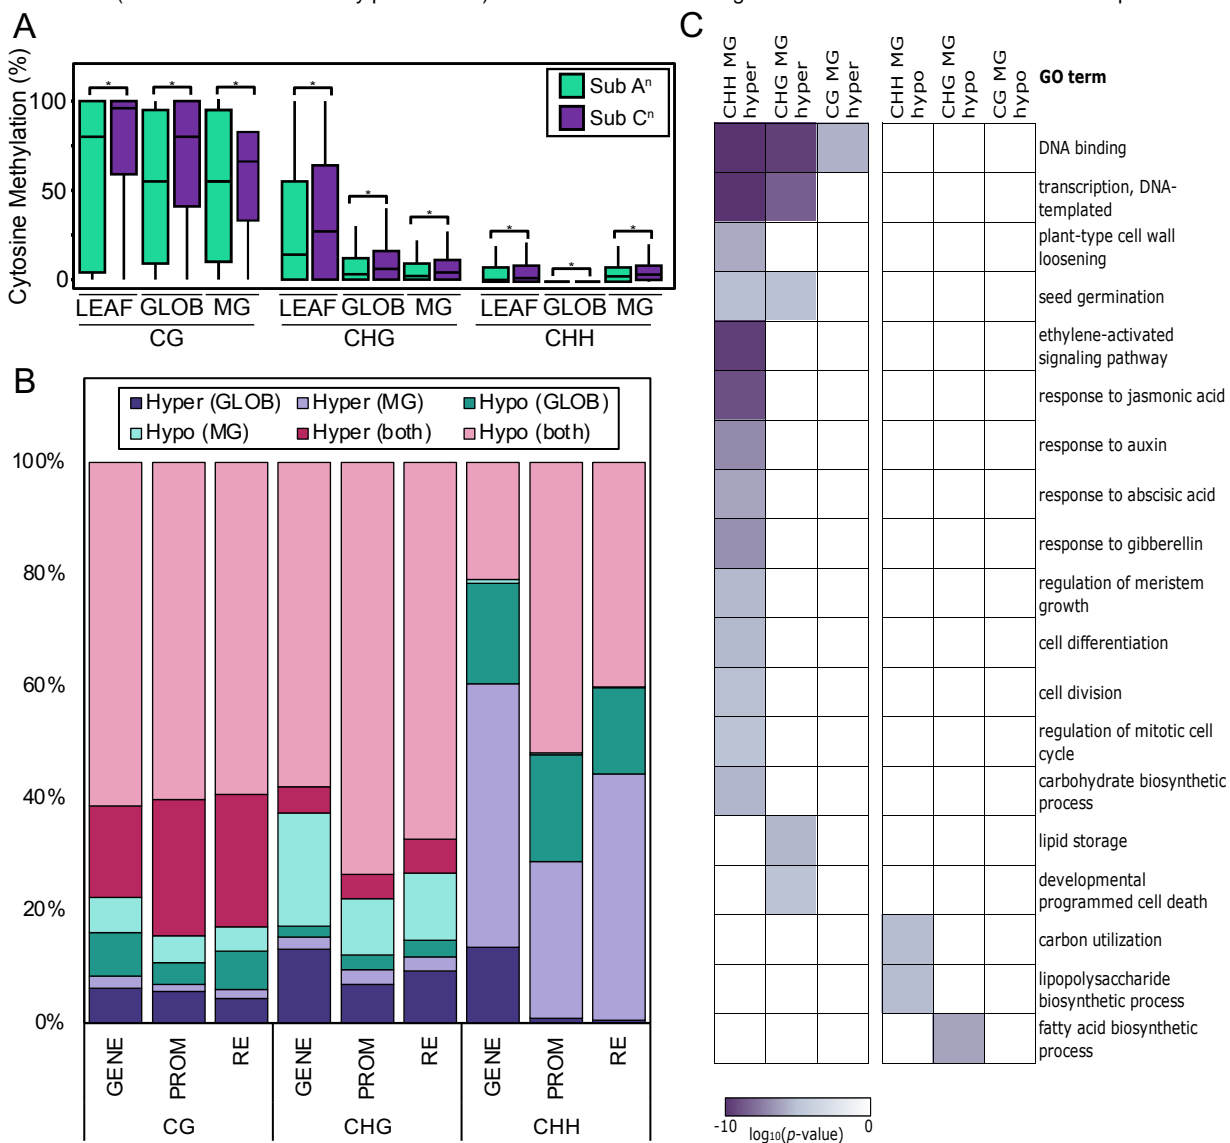

**Figure 4. Shifts in DNA methylation between in development.** (A) Quantile boxplots show level of cytosine methylation on promoters (1kb upstream of TSS) in the syntenic regions for leaves, and GLOB and MG seeds in the CG, CHG, and CHH contexts. Significant differences in cytosine methylation between the A<sup>n</sup> (teal) and C<sup>n</sup> (purple) subgenomes is indicated with an asterisk ( $p < 0.001$  Mann-Whitney-Wilcoxon, Bonferonni adjustment for multiple comparisons). (B) Stacked 100% column showing hyper- and hypo-methylated genes (GENE), 1kb upstream regulatory regions (promoters, PROM), and repetitive elements (RE) between seeds (GLOB and MG) and leaves. Data are separated into hyper-methylated in GLOB (dark purple) or MG seeds (light purple), hypo-methylated in GLOB (dark teal) or MG (light teal) seeds, and hyper-methylated (dark pink) or hypo-methylated (light pink) in both GLOB and MG stages. (C) GO enrichment of genes with differentially methylated promoters between the GLOB and MG stages of seed development. Highly enriched GO terms are indicated by darker colouring. Gene lists and enrichment output can be found in Dataset S4.

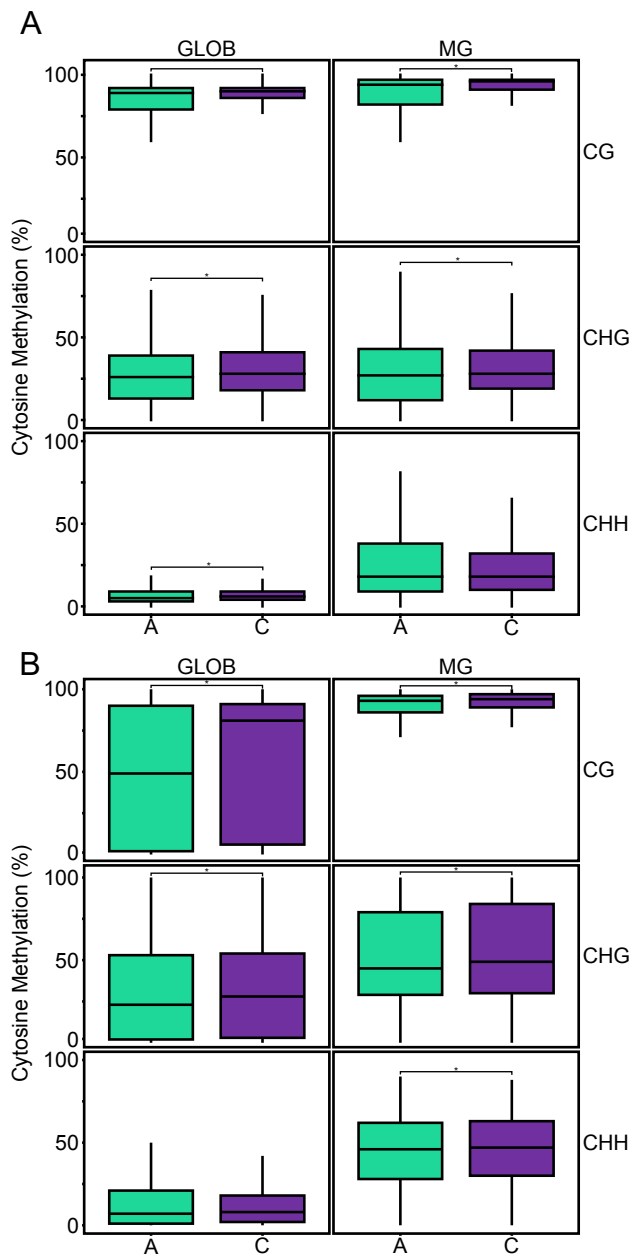

**Figure 5. Subgenome methylation bias on repetitive elements and siRNAs.** (A) Quantile boxplots showing the methylation levels of repetitive elements (A) and active/detected siRNA clusters (B) in the largest syntenic regions between the A<sup>n</sup> (teal) and C<sup>n</sup> (purple) subgenomes for GLOB and MG seeds in the the CG, CHG, and CHH cytosine contexts. Significant difference of methylation levels between the two subgenomes is indicated by an asterisk (\*) (Mann Whitney Wilcoxon,  $p < 0.001$ , Bonferonni correction for multiple testing).



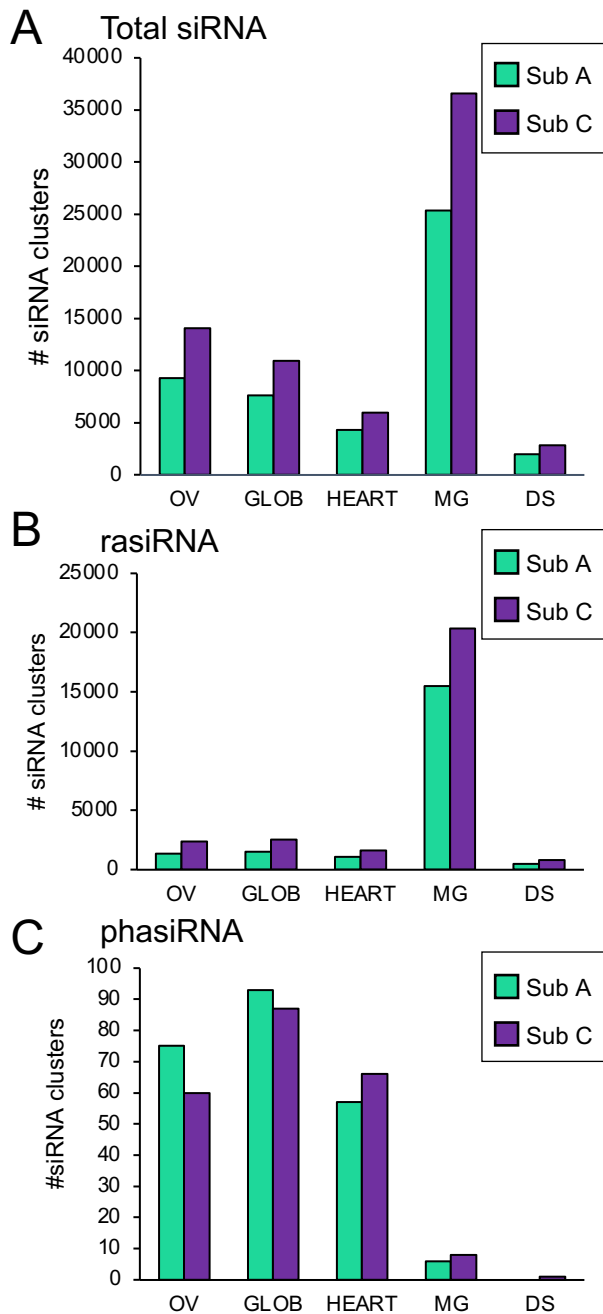

**Figure 6. siRNA cluster diversity of five developmental seed stages in *Brassica napus*, beginning in gametogenesis (OV), and ending in maturation and dormancy (DS). (A)** Total diversity of active siRNA clusters in five seed developmental stages by subgenome (A subgenome in bright green, C subgenome in purple). Number of unique clusters of **(B)** rasiRNA and **(C)** phasiRNA per seed stage.

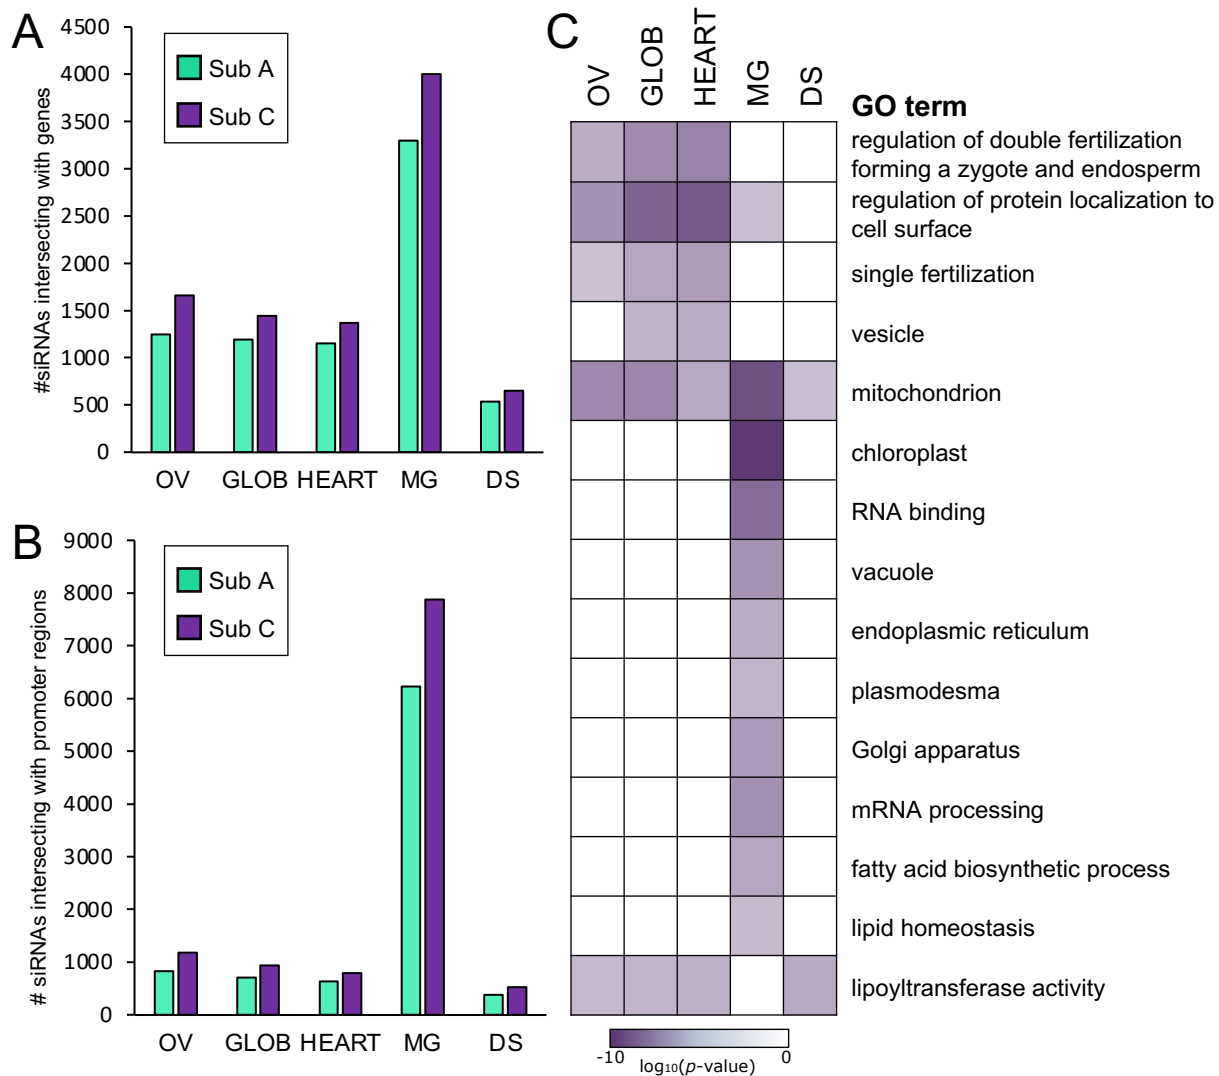

**Figure 7. siRNA clusters encoded by gene bodies and promoters. (A)** Clusters of siRNAs originating from gene bodies spike in the MG stage, with consistent  $C^n$  subgenome bias. **(B)** Clusters of unique siRNAs encoded within the promoter region of gene bodies also spike in the MG stage, with a notable increase in diversity than seen in gene bodies. **(C)** GO analysis of coding genes associated with the promoter region encoding siRNA clusters



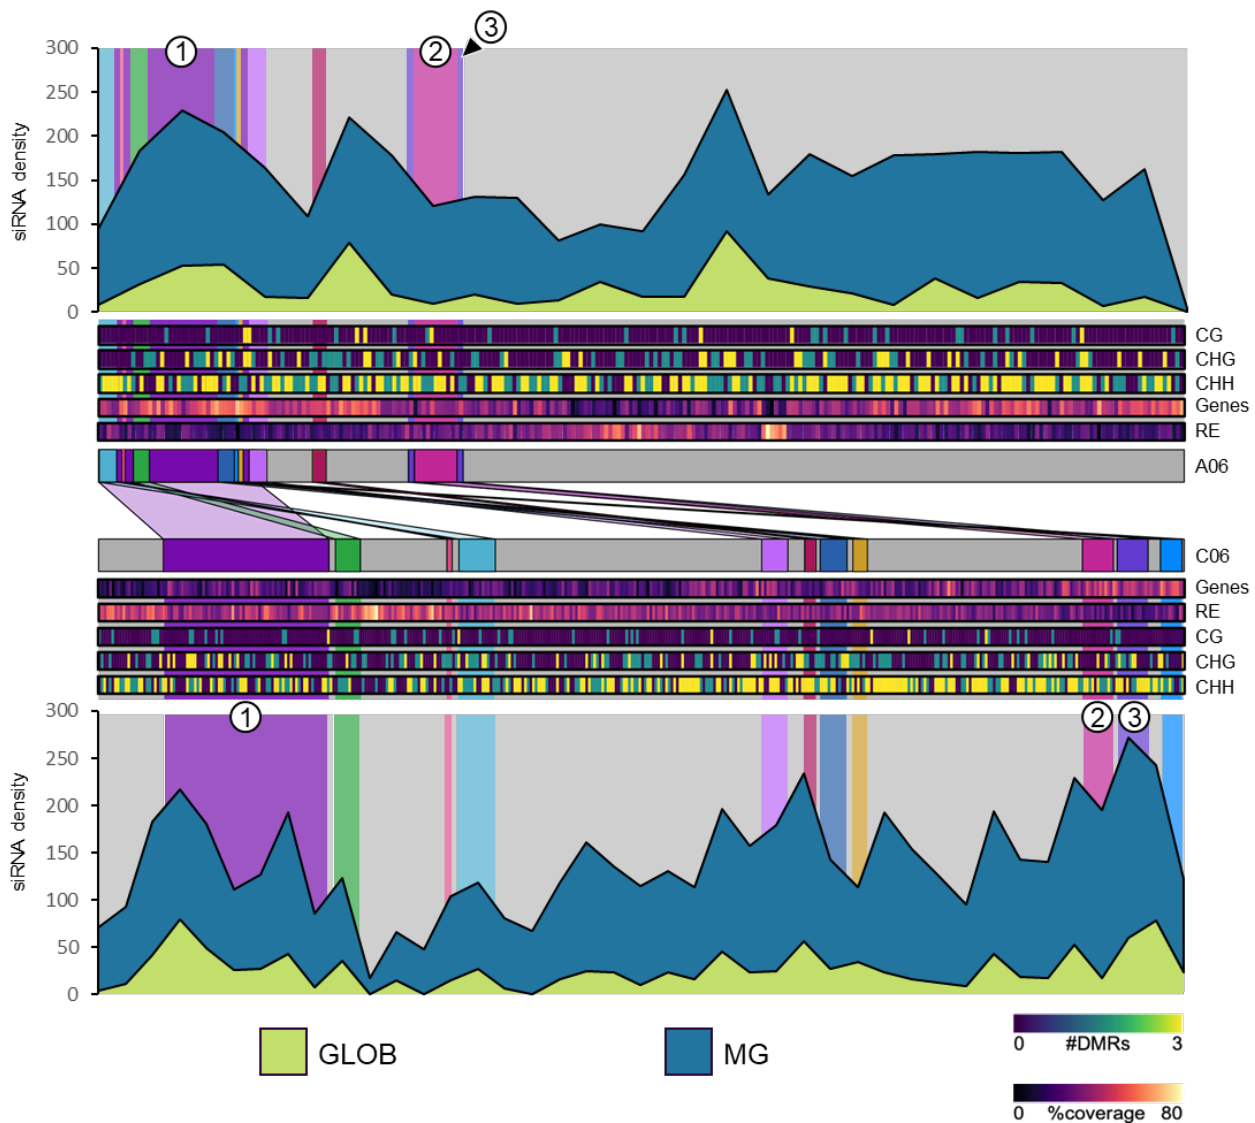

**Figure 9. Genomic architecture of a low homology chromosome pair (A06 and C06).**

Syntenic map linking homologous regions between A06 and C06 are located to the centre. Colours on the syntenic map represent matching syntenic regions between the A<sup>n</sup> and C<sup>n</sup> subgenomes, grey areas indicate no corresponding synteny. Area plots represent siRNA cluster density in the GLOB and MG seed stages in 100kbp windows. Heat maps indicate both the density of protein-coding genes and repetitive elements (RE), as well as GLOB-MG differentially methylated regions (DMRs) of each cytosine context (CG, CHG, and CHH). Syntenic regions of interest are marked (1, 2, 3) and referenced in text.

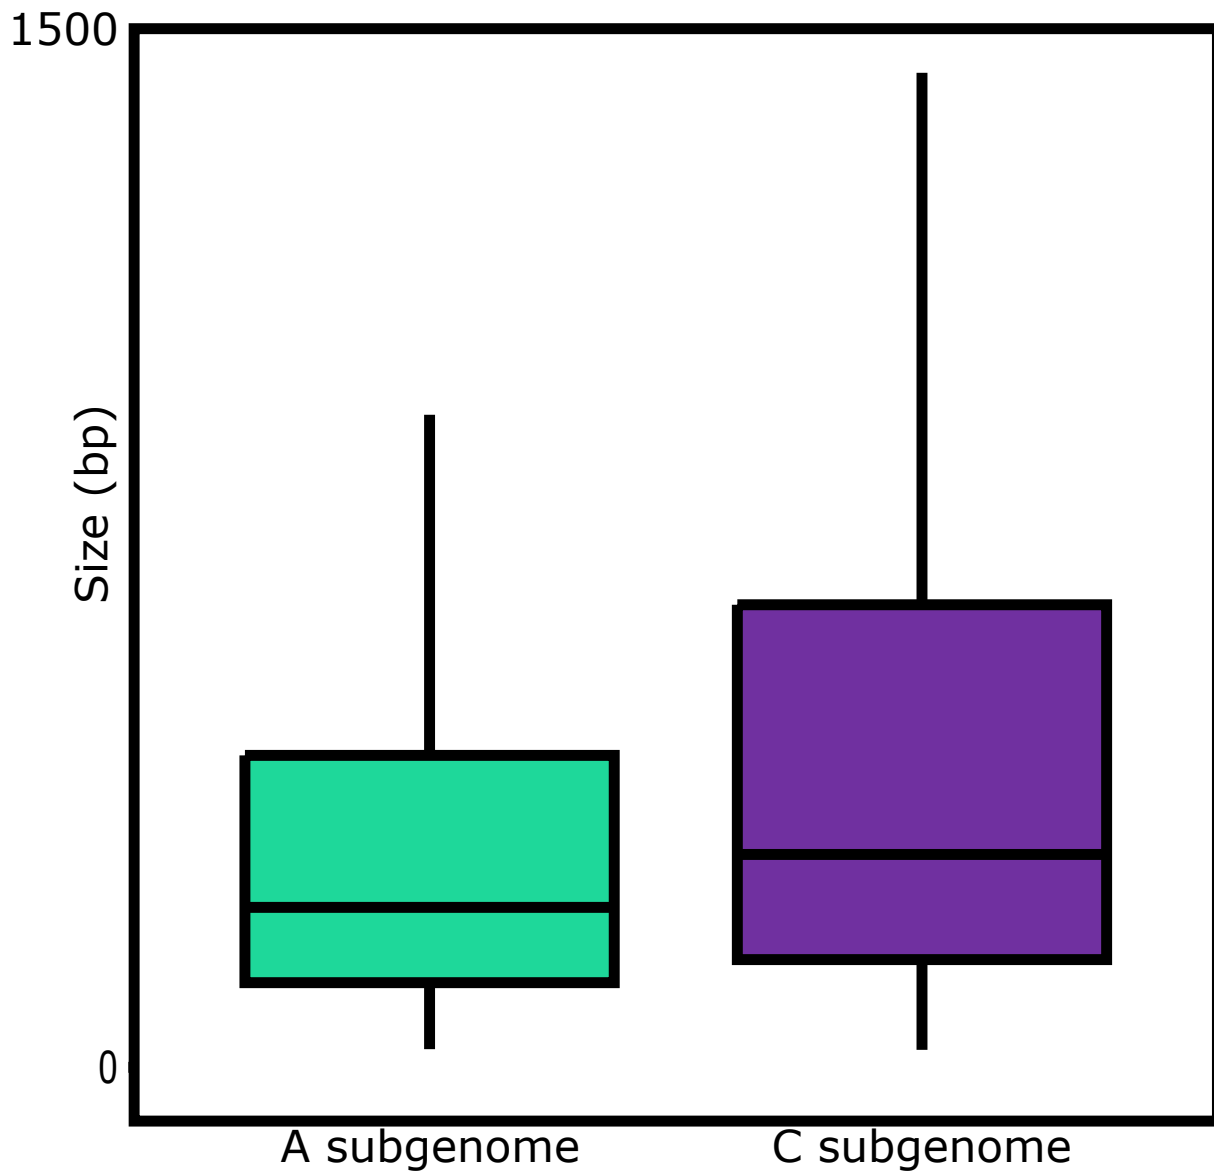

Figure S1. Quantile boxplots showing the distribution of size of repetitive elements (REs) in the A<sup>n</sup> (teal) and C<sup>n</sup> (purple) subgenomes of *B. napus* cv. DH12075.

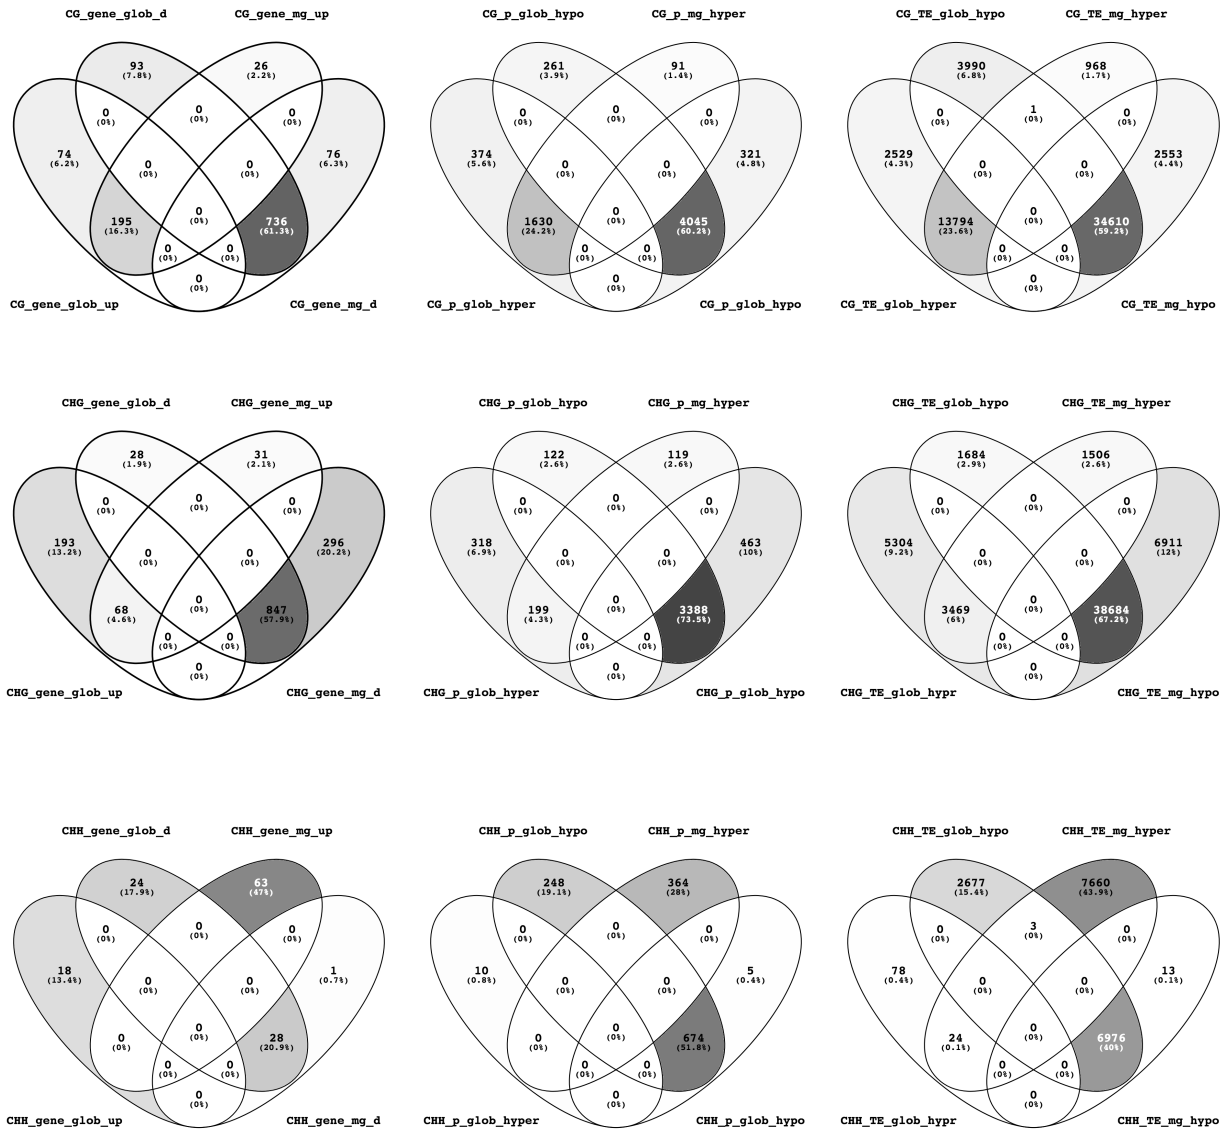

**Figure S2. Differential methylation between leaves and seeds**

Venn diagrams showing hyper and hypo methylated genes, promoters and repetitive elements in GLOB and MG seeds relative to leaves. Differential methylation was determined using MethylKit over 400bp windows of the genome. Intersection with transposable elements was determined using BEDtools. Gene lists for Venn intersects can be found in Data DK3.

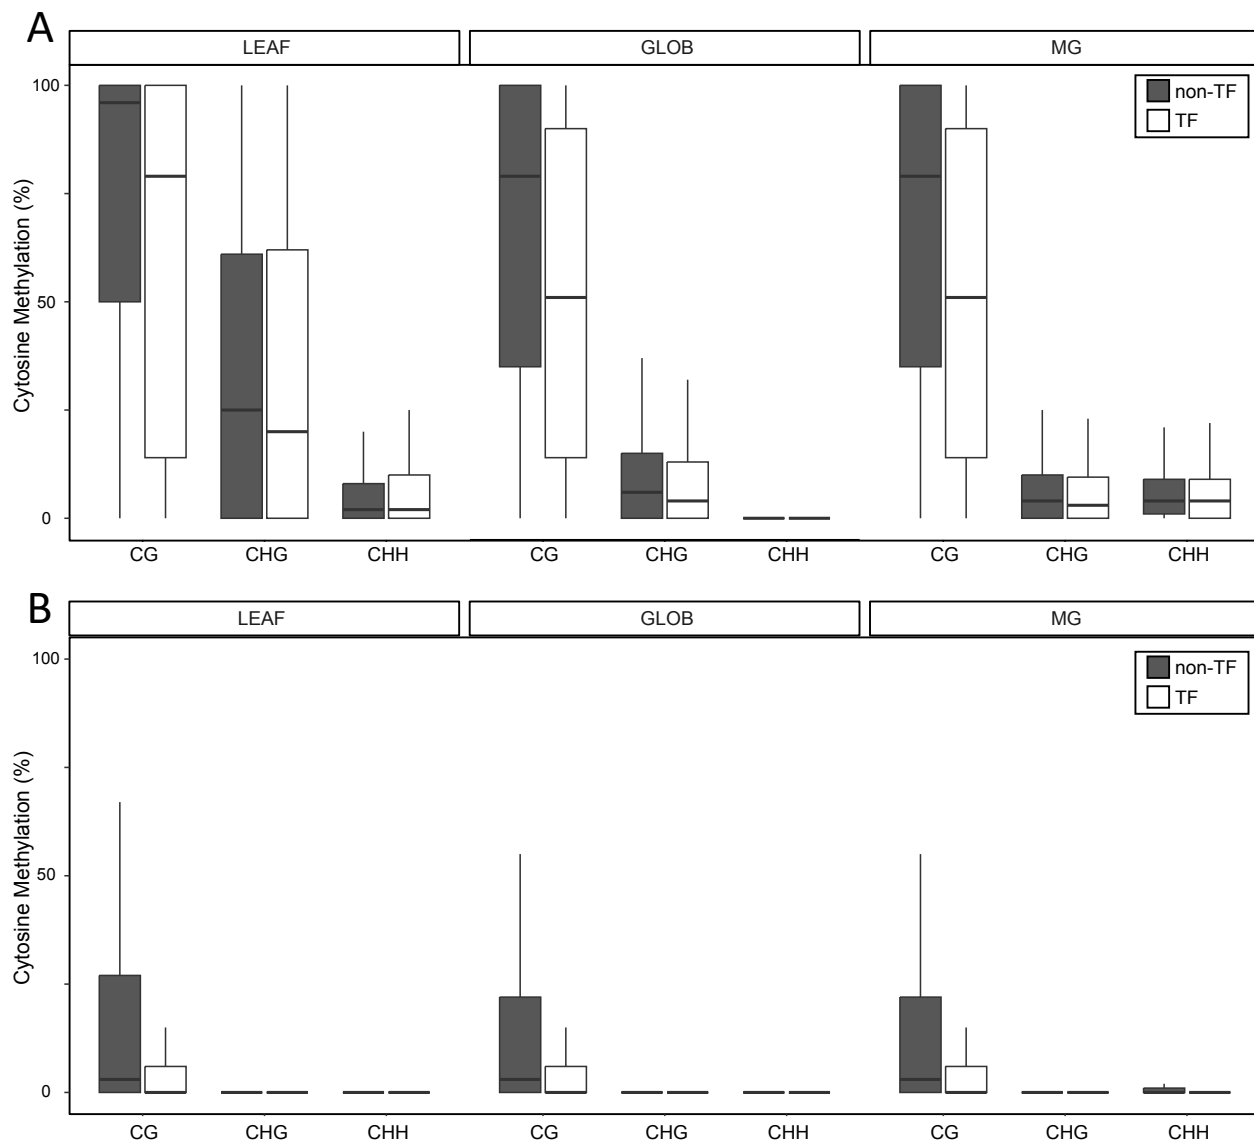

**Figure S3. Methylation levels of transcription factors.** Quantile boxplots illustrating the methylation levels of gene bodies (A) and promoters (B; 1kb upstream of TSS) of non-transcription factor genes (grey) and transcription factors (white) in the CG, CHG, and CHH contexts in leaves, and globular (GLOB) and mature green (MG) seeds).



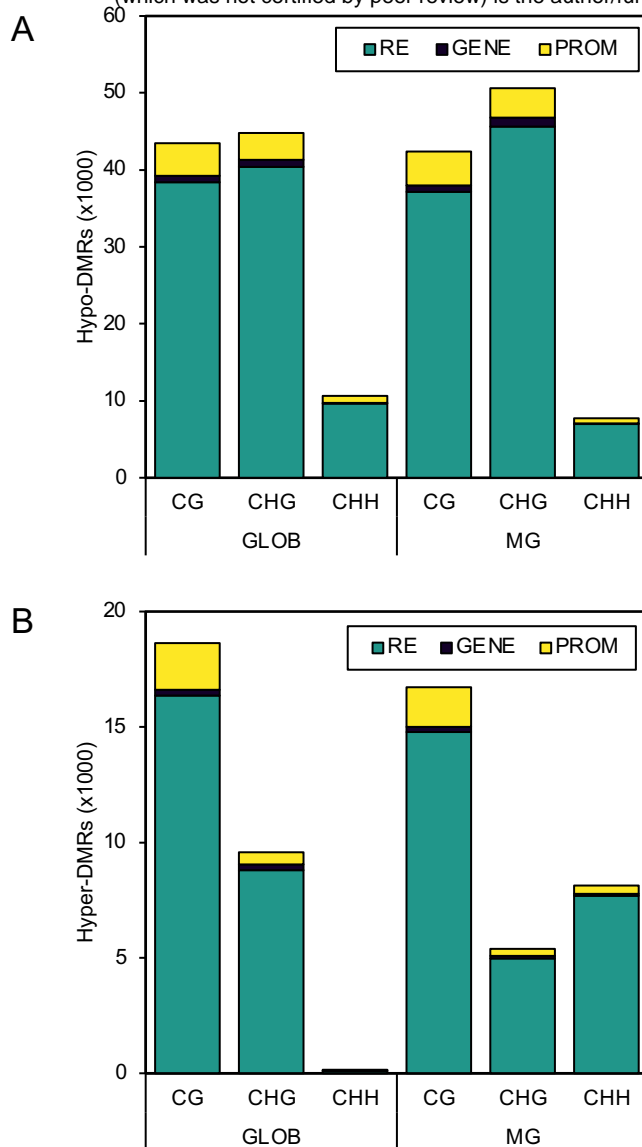

**Figure S4. Shifts in DNA methylation between in development.** (A-B) Differential cytosine methylation in seeds relative to leaves. The GLOB and MG seed methylomes were compared to the leaf methylome (Parkin et al., unpublished). Differential methylation was calculated for all three cytosine contexts (CG, CHG, CHH) over genes, promoters and repetitive elements (REs). Number of differentially methylated REs (teal), gene bodies (purple) and promoters (yellow) that are (A) hypomethylated in the GLOB or MG seed relative to leaves or (B) hypermethylated in the GLOB or MG seed relative to leaves.

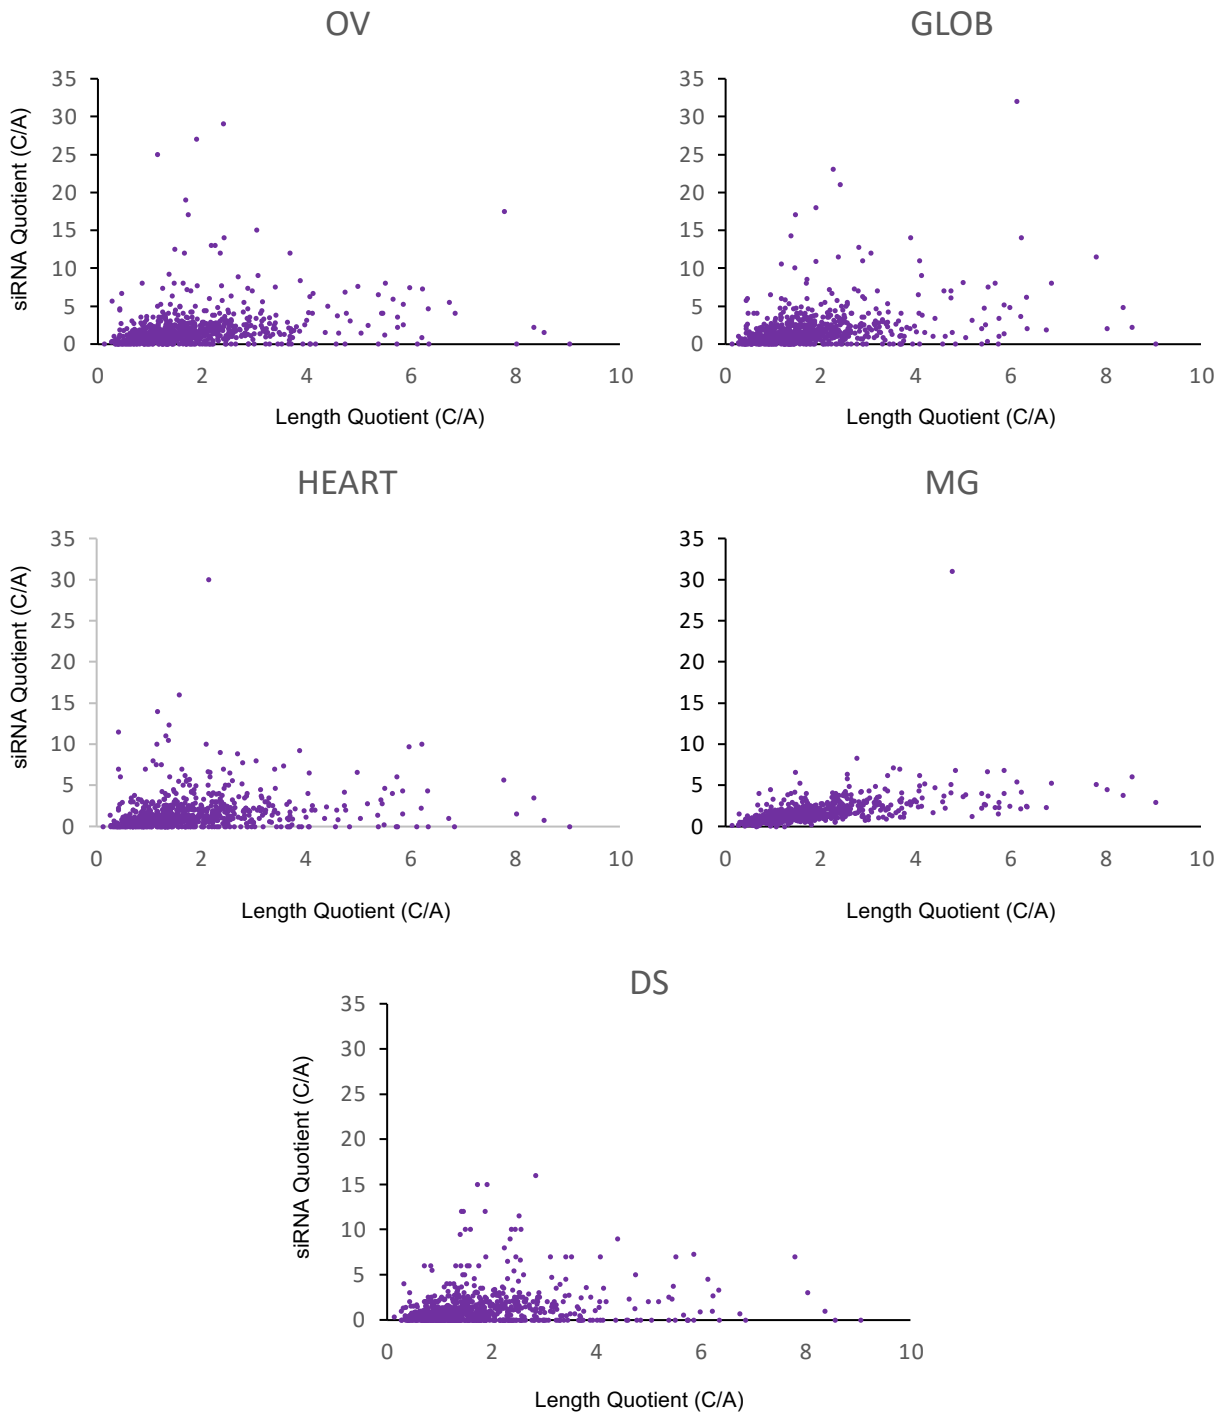

**Figure S5. Relationship between length disparity of syntenic regions and siRNA abundance between the A<sup>n</sup> and C<sup>n</sup> subgenomes.** siRNA quotient represented by total siRNA clusters intersecting with the syntenic block of the C<sup>n</sup> subgenome divided by the number of siRNA clusters in the corresponding syntenic block in the A<sup>n</sup> subgenome. Length quotient represented as the length of the C<sup>n</sup> subgenome's syntenic block length (in bp) divided by the length of the A<sup>n</sup> subgenome's syntenic block length (in bp). siRNAs active in seed development do not accumulate proportionately with high disparity in syntenic block length.

## Parsed Citations

- Alexander-Webber, D., Abbott, R.J., and Chapman, M.A. (2016). Morphological convergence between an allopolyploid and one of its parental species correlates with biased gene expression and DNA loss. *J. Hered.* 107: 445–454.  
Google Scholar: [Author Only](#) [Title Only](#) [Author and Title](#)
- Axtell, M.J. (2013). ShortStack: Comprehensive annotation and quantification of small RNA genes. *RNA* 19: 740–751.  
Google Scholar: [Author Only](#) [Title Only](#) [Author and Title](#)
- Axtell, M.J. and Meyers, B.C. (2018). Revisiting criteria for plant microRNA annotation in the era of big data. *Plant Cell* 30: 272–284.  
Google Scholar: [Author Only](#) [Title Only](#) [Author and Title](#)
- Bird, K., Niederhuth, C., Ou, S., Gehan, M., Pires, J.C., Xiong, Z., VanBuren, R., and Edger, P. (2019). Replaying the evolutionary tape to investigate subgenome dominance in allopolyploid *Brassica napus*. *bioRxiv*: 814491.  
Google Scholar: [Author Only](#) [Title Only](#) [Author and Title](#)
- Bouyer, D., Kramdi, A., Kassam, M., Heese, M., Schnittger, A., Roudier, F., and Colot, V. (2017). DNA methylation dynamics during early plant life. *Genome Biol.* 18.  
Google Scholar: [Author Only](#) [Title Only](#) [Author and Title](#)
- Cai, G., Yang, Q., Yi, B., Fan, C., Edwards, D., Batley, J., and Zhou, Y. (2014). A complex recombination pattern in the genome of allotetraploid *Brassica napus* as revealed by a high-density genetic map. *PLoS One* 9: e109910.  
Google Scholar: [Author Only](#) [Title Only](#) [Author and Title](#)
- Chalhoub, B. et al. (2014). Early allopolyploid evolution in the post-neolithic *Brassica napus* oilseed genome. *Science* (80-. ). 345: 950–953.  
Google Scholar: [Author Only](#) [Title Only](#) [Author and Title](#)
- Chen, C., Zeng, Z., Liu, Z., and Xia, R. (2018). Small RNAs, emerging regulators critical for the development of horticultural traits. *Hortic. Res.* 5.  
Google Scholar: [Author Only](#) [Title Only](#) [Author and Title](#)
- Cheng, F., Wu, J., Cai, X., Liang, J., Freeling, M., and Wang, X. (2018). Gene retention, fractionation and subgenome differences in polyploid plants. *Nat. Plants* 4: 258–268.  
Google Scholar: [Author Only](#) [Title Only](#) [Author and Title](#)
- Cheng, F., Wu, J., and Wang, X. (2014). Genome triplication drove the diversification of *Brassica* plants. *Hortic. Res.* 1: 1.  
Google Scholar: [Author Only](#) [Title Only](#) [Author and Title](#)
- Coate, J.E., Bar, H., and Doyle, J.J. (2014). Extensive translational regulation of gene expression in an allopolyploid (*Glycine dolichocarpa*). *Plant Cell* 26: 136–150.  
Google Scholar: [Author Only](#) [Title Only](#) [Author and Title](#)
- Cokus, S.J., Feng, S., Zhang, X., Chen, Z., Merriman, B., Haudenschild, C.D., Pradhan, S., Nelson, S.F., Pellegrini, M., and Jacobsen, S.E. (2008). Shotgun bisulphite sequencing of the *Arabidopsis* genome reveals DNA methylation patterning. *Nature* 452: 215–219.  
Google Scholar: [Author Only](#) [Title Only](#) [Author and Title](#)
- Comai, L., Tyagi, A.P., Winter, K., Holmes-Davis, R., Reynolds, S.H., Stevens, Y., and Byers, B. (2000). Phenotypic instability and rapid gene silencing in newly formed *Arabidopsis* allotetraploids. *Plant Cell* 12: 1551–1567.  
Google Scholar: [Author Only](#) [Title Only](#) [Author and Title](#)
- D'Ario, M., Griffiths-Jones, S., and Kim, M. (2017). Small RNAs: Big impact on plant development. *Trends Plant Sci.* 22: 1056–1068.  
Google Scholar: [Author Only](#) [Title Only](#) [Author and Title](#)
- Davis-Richardson, A.G., Russell, J.T., Dias, R., McKinlay, A.J., Canepa, R., Fagen, J.R., Rusoff, K.T., Drew, J.C., Kolaczowski, B., Emerich, D.W., and Triplett, E.W. (2016). Integrating DNA methylation and gene expression data in the development of the soybean-*Bradyrhizobium* N<sub>2</sub>-fixing symbiosis. *Front. Microbiol.* 7: 518.  
Google Scholar: [Author Only](#) [Title Only](#) [Author and Title](#)
- Deng, P., Muhammad, S., Cao, M., and Wu, L. (2018). Biogenesis and regulatory hierarchy of phased small interfering RNAs in plants. *Plant Biotechnol. J.* 16: 965–975.  
Google Scholar: [Author Only](#) [Title Only](#) [Author and Title](#)
- Dresselhaus, T. and Franklin-Tong, N. (2013). Male-female crosstalk during pollen germination, tube growth and guidance, and double fertilization. *Mol. Plant* 6: 1018–1036.  
Google Scholar: [Author Only](#) [Title Only](#) [Author and Title](#)
- Edger, P.P. et al. (2017). Subgenome dominance in an interspecific hybrid, synthetic allopolyploid, and a 140-year-old naturally established neo-allopolyploid monkeyflower. *Plant Cell* 29: 2150–2167.  
Google Scholar: [Author Only](#) [Title Only](#) [Author and Title](#)
- Emery, M., Willis, M.M.S., Hao, Y., Barry, K., Oakgrove, K., Peng, Y., Schmutz, J., Lyons, E., Pires, J.C., Edger, P.P., and Conant, G.C. (2018). Preferential retention of genes from one parental genome after polyploidy illustrates the nature and scope of the genomic

**conflicts induced by hybridization. PLoS Genet. 14.**

Google Scholar: [Author Only Title Only Author and Title](#)

**Franzke, A., Lysak, M.A., Al-Shehbaz, I.A., Koch, M.A., and Mummenhoff, K. (2011). Cabbage family affairs: The evolutionary history of Brassicaceae. Trends Plant Sci. 16: 108–116.**

Google Scholar: [Author Only Title Only Author and Title](#)

**Gardiner, L.J., Quinton-Tulloch, M., Olohan, L., Price, J., Hall, N., and Hall, A. (2015). A genome-wide survey of DNA methylation in hexaploid wheat. Genome Biol. 16: 273.**

Google Scholar: [Author Only Title Only Author and Title](#)

**Guignard, L.M. (1902). La double fécondation chez les Crucifères. Journale Bot. 16: 361–368.**

Google Scholar: [Author Only Title Only Author and Title](#)

**Ha, M., Lu, J., Tian, L., Ramachandran, V., Kasschau, K.D., Chapman, E.J., Carrington, J.C., Chen, X., Wang, X.J., and Chen, Z.J. (2009). Small RNAs serve as a genetic buffer against genomic shock in Arabidopsis interspecific hybrids and allopolyploids. Proc. Natl. Acad. Sci. U. S. A. 106: 17835–17840.**

Google Scholar: [Author Only Title Only Author and Title](#)

**Hardigan, M.A., Feldmann, M.J., Lorant, A., Bird, K.A., Famula, R., Acharya, C., Cole, G., Edger, P.P., and Knapp, S.J. (2020). Genome synteny has been conserved among the octoploid progenitors of cultivated strawberry over millions of years of evolution. Front. Plant Sci. 10: 1.**

Google Scholar: [Author Only Title Only Author and Title](#)

**Jenik, P.D., Gillmor, C.S., and Lukowitz, W. (2007). Embryonic patterning in Arabidopsis thaliana. Annu. Rev. Cell Dev. Biol. 23: 207–36.**

Google Scholar: [Author Only Title Only Author and Title](#)

**Ji, L., Sasaki, T., Sun, X., Ma, P., Lewis, Z.A., and Schmitz, R.J. (2014). Methylated DNA is over-represented in whole-genome bisulfite sequencing data. Front. Genet. 5.**

Google Scholar: [Author Only Title Only Author and Title](#)

**Kawakatsu, T., Nery, J.R., Castanon, R., and Ecker, J.R. (2017). Dynamic DNA methylation reconfiguration during seed development and germination. Genome Biol. 18: 171.**

Google Scholar: [Author Only Title Only Author and Title](#)

**Kellogg, E.A. (2003). What happens to genes in duplicated genomes. Proc. Natl. Acad. Sci. U. S. A. 100: 4369–4371.**

Google Scholar: [Author Only Title Only Author and Title](#)

**Kenan-Eichler, M., Leshkowitz, D., Tal, L., Noor, E., Melamed-Bessudo, C., Feldman, M., and Levy, A.A. (2011). Wheat hybridization and polyploidization results in deregulation of small RNAs. Genetics 188: 263–272.**

Google Scholar: [Author Only Title Only Author and Title](#)

**Kim, M., Ohr, H., Lee, J.W., Hyun, Y., Fischer, R.L., and Choi, Y. (2008). Temporal and spatial downregulation of Arabidopsis MET1 activity results in global DNA hypomethylation and developmental defects. Mol. Cells 26: 611–615.**

Google Scholar: [Author Only Title Only Author and Title](#)

**Kirkbride, R.C., Lu, J., Zhang, C., Mosher, R.A., Baulcombe, D.C., and Jeffrey Chen, Z. (2019). Maternal small RNAs mediate spatial-temporal regulation of gene expression, imprinting, and seed development in Arabidopsis. Proc. Natl. Acad. Sci. U. S. A. 116: 2761–2766.**

Google Scholar: [Author Only Title Only Author and Title](#)

**Leviczky, T., Molnár, E., Papdi, C., O Szi, E., Horváth, G. V., Vizler, C., Nagy, V., Pauk, J., Bögre, L., and Magyar, Z. (2019). E2FA and E2FB transcription factors coordinate cell proliferation with seed maturation. Dev. 146.**

Google Scholar: [Author Only Title Only Author and Title](#)

**Li, A. et al. (2014). mRNA and small RNA transcriptomes reveal insights into dynamic homeolog regulation of allopolyploid heterosis in nascent hexaploid wheat. Plant Cell 26: 1–24.**

Google Scholar: [Author Only Title Only Author and Title](#)

**Li, J. et al. (2016). Global DNA methylation variations after short-term heat shock treatment in cultured microspores of Brassica napus cv. Topas. Sci. Rep. 6.**

Google Scholar: [Author Only Title Only Author and Title](#)

**Li, Q., Xiong, Z., Mei, J., Song, H., and Qian, W. (2017). Genetics and epigenetic alterations of hexaploid early generation derived from hybrid between Brassica napus and B. oleracea. bioRxiv.**

Google Scholar: [Author Only Title Only Author and Title](#)

**Lin, J.-Y., Le, B.H., Chen, M., Henry, K.F., Hur, J., Hsieh, T.-F., Chen, P.-Y., Pelletier, J.M., Pellegrini, M., Fischer, R.L., Harada, J.J., and Goldberg, R.B. (2017). Similarity between soybean and Arabidopsis seed methylomes and loss of non-CG methylation does not affect seed development. Proc. Natl. Acad. Sci. 114: E9730–E9739.**

Google Scholar: [Author Only Title Only Author and Title](#)

**Liu, Y., Ke, L., Wu, G., Xu, Y., Wu, X., Xia, R., Deng, X., and Xu, Q. (2017). miR3954 is a trigger of phasiRNAs that affects flowering time in citrus. Plant J. 92: 263–275.**

Google Scholar: [Author Only](#) [Title Only](#) [Author and Title](#)

**Matzke, M.A. and Moshier, R.A. (2014). RNA-directed DNA methylation: An epigenetic pathway of increasing complexity. *Nat. Rev. Genet.* 15: 394–408.**

Google Scholar: [Author Only](#) [Title Only](#) [Author and Title](#)

**Narsai, R., Gouil, Q., Secco, D., Srivastava, A., Karpievitch, Y. V., Liew, L.C., Lister, R., Lewsey, M.G., and Whelan, J. (2017). Extensive transcriptomic and epigenomic remodelling occurs during *Arabidopsis thaliana* germination. *Genome Biol.* 18.**

Google Scholar: [Author Only](#) [Title Only](#) [Author and Title](#)

**Parisod, C., Alix, K., Just, J., Petit, M., Sarilar, V., Mhiri, C., Ainouche, M., Chalhoub, B., and Grandbastien, M.A. (2010). Impact of transposable elements on the organization and function of allopolyploid genomes. *New Phytol.* 186: 37–45.**

Google Scholar: [Author Only](#) [Title Only](#) [Author and Title](#)

**Parisod, C., Salmon, A., Zerjal, T., Tenaillon, M., and Ainouche, M. (2009). Rapid structural and epigenetic reorganization near transposable elements in hybrid and allopolyploid genomes in *Spartina*. *New Phytol.* 184: 1003–1015.**

Google Scholar: [Author Only](#) [Title Only](#) [Author and Title](#)

**Ren, R., Wang, H., Guo, C., Zhang, N., Zeng, L., Chen, Y., Ma, H., and Qi, J. (2018). Widespread whole genome duplications contribute to genome complexity and species diversity in angiosperms. *Mol. Plant* 11: 414–428.**

Google Scholar: [Author Only](#) [Title Only](#) [Author and Title](#)

**Shen, E. et al. (2015). Identification, evolution, and expression partitioning of miRNAs in allopolyploid *Brassica napus*. *J. Exp. Bot.* 66: 7241–7253.**

Google Scholar: [Author Only](#) [Title Only](#) [Author and Title](#)

**Smith, Z.R. and Long, J.A. (2010). Control of *Arabidopsis* apical-basal embryo polarity by antagonistic transcription factors. *Nature* 464: 423–426.**

Google Scholar: [Author Only](#) [Title Only](#) [Author and Title](#)

**Song, Q., Guan, X., and Chen, Z.J. (2015). Dynamic roles for small RNAs and DNA methylation during ovule and fiber development in allotetraploid cotton. *PLoS Genet.* 11: e1005724.**

Google Scholar: [Author Only](#) [Title Only](#) [Author and Title](#)

**Springer, N.M., Lisch, D., and Li, Q. (2015). Creating order from chaos: Epigenome dynamics in plants with complex genomes. *Plant Cell* 28: 314–325.**

Google Scholar: [Author Only](#) [Title Only](#) [Author and Title](#)

**Tang, H., Bowers, J.E., Wang, X., Ming, R., Alam, M., and Paterson, A.H. (2008). Synteny and collinearity in plant genomes. *Science* (80-). 320: 486–488.**

Google Scholar: [Author Only](#) [Title Only](#) [Author and Title](#)

**Tykarska, T. (1979). Rape embryogenesis. II. Development of embryo proper. *Acta Soc. Bot. Pol.* 48: 391–421.**

Google Scholar: [Author Only](#) [Title Only](#) [Author and Title](#)

**Tykarska, T. (1980). Rape embryogenesis. III. Embryo development in time. *Acta Soc. Bot. Pol.* 49: 369–385.**

Google Scholar: [Author Only](#) [Title Only](#) [Author and Title](#)

**Tykarska, T. (1976). Rape embryogenesis I. The proembryo development. *Acta Soc. Bot. Pol.* 45: 3–16.**

Google Scholar: [Author Only](#) [Title Only](#) [Author and Title](#)

**Wang, F. and Axtell, M.J. (2017). AGO4 is specifically required for heterochromatic siRNA accumulation at Pol V-dependent loci in *Arabidopsis thaliana*. *Plant J.* 90: 37–47.**

Google Scholar: [Author Only](#) [Title Only](#) [Author and Title](#)

**Wang, J., Mei, J., and Ren, G. (2019). Plant microRNAs: Biogenesis, homeostasis, and degradation. *Front. Plant Sci.* 10: 360.**

Google Scholar: [Author Only](#) [Title Only](#) [Author and Title](#)

**Wang, J., Tian, L., Lee, H.S., Wei, N.E., Jiang, H., Watson, B., Madlung, A., Osborn, T.C., Doerge, R.W., Comai, L., and Chen, Z.J. (2006). Genome-wide nonadditive gene regulation in *Arabidopsis* allotetraploids. *Genetics* 172: 507–517.**

Google Scholar: [Author Only](#) [Title Only](#) [Author and Title](#)

**Wendel, J.F., Lisch, D., Hu, G., and Mason, A.S. (2018). The long and short of doubling down: polyploidy, epigenetics, and the temporal dynamics of genome fractionation. *Curr. Opin. Genet. Dev.* 49: 1–7.**

Google Scholar: [Author Only](#) [Title Only](#) [Author and Title](#)

**Wu, J., Lin, L., Xu, M., Chen, P., Liu, D., Sun, Q., Ran, L., and Wang, Y. (2018). Homoeolog expression bias and expression level dominance in resynthesized allopolyploid *Brassica napus*. *BMC Genomics* 19: 586.**

Google Scholar: [Author Only](#) [Title Only](#) [Author and Title](#)

**Xia, R., Chen, C., Pokhrel, S., Ma, W., Huang, K., Patel, P., Wang, F., Xu, J., Liu, Z., Li, J., and Meyers, B.C. (2019). 24-nt reproductive phasiRNAs are broadly present in angiosperms. *Nat. Commun.* 10: 1–8.**

Google Scholar: [Author Only](#) [Title Only](#) [Author and Title](#)

**Xiao, W., Brown, R.C., Lemmon, B.E., Harada, J.J., Goldberg, R.B., and Fischer, R.L. (2006a). Regulation of seed size by hypomethylation of maternal and paternal genomes. *Plant Physiol.* 142: 1160–1168.**

Google Scholar: [Author Only](#) [Title Only](#) [Author and Title](#)

**Xiao, W., Custard, R.D., Brown, R.C., Lemmon, B.E., Harada, J.J., Goldberg, R.B., and Fischer, R.L. (2006b). DNA methylation is critical for *Arabidopsis* embryogenesis and seed viability. *Plant Cell* 18: 805–814.**

Google Scholar: [Author Only](#) [Title Only](#) [Author and Title](#)

**Xing, M.-Q.Q. et al. (2015). Global analysis reveals the crucial roles of DNA methylation during rice seed development. *Plant Physiol.* 168: 1417–1432.**

Google Scholar: [Author Only](#) [Title Only](#) [Author and Title](#)

**Zhang, M., Kimatu, J.N., Xu, K., and Liu, B. (2010). DNA cytosine methylation in plant development. *J. Genet. Genomics* 37: 1–12.**

Google Scholar: [Author Only](#) [Title Only](#) [Author and Title](#)

**Zhao, T., Tao, X., Li, M., Gao, M., Chen, J., Zhou, N., Mei, G., Fang, L., Ding, L., Zhou, B., Zhang, T., and Guan, X. (2020). Role of phasiRNAs from two distinct phasing frames of GhMYB2 loci in cis- gene regulation in the cotton genome. *BMC Plant Biol.* 20: 219.**

Google Scholar: [Author Only](#) [Title Only](#) [Author and Title](#)

**Zhou, M. and Law, J.A. (2015). RNA Pol IV and V in gene silencing: Rebel polymerases evolving away from Pol II's rules. *Curr. Opin. Plant Biol.* 27: 154–164.**

Google Scholar: [Author Only](#) [Title Only](#) [Author and Title](#)
